# Emerin self-assembly and nucleoskeletal coupling regulate nuclear envelope mechanics against stress

Emerin oligomers resist nuclear stress

Anthony Fernandez<sup>1</sup>, Markville Bautista<sup>2</sup>, Liying Wu<sup>1</sup> and Fabien Pinaud<sup>1,2,3\*</sup>

<sup>1</sup>Department of Biological Sciences, University of Southern California, 1050 Childs Way, Los Angeles, CA 90089, USA.

<sup>2</sup>Department of Chemistry, University of Southern California, 1050 Childs Way, Los Angeles, CA 90089, USA.

<sup>3</sup>Department of Physics and Astronomy, University of Southern California, 1050 Childs Way, Los Angeles, CA 90089, USA.

\*Correspondence should be addressed to F.P. (pinaud@usc.edu)

## Abstract

Emerin is an integral nuclear envelope protein participating in the maintenance of nuclear shape. When mutated or absent, emerin causes X-linked Emery-Dreifuss muscular dystrophy (EDMD). To define how emerin takes parts in molecular scaffolding at the nuclear envelope and helps protect the nucleus against mechanical stress, we established its nanoscale organization using single molecule tracking and super-resolution microscopy. We show that emerin monomers form localized oligomeric nanoclusters stabilized by both lamin A/C and SUN1 at the LINC complex. Interactions of emerin with nuclear actin and BAF additionally modulate its membrane mobility and its ability to oligomerize. In nuclei subjected to mechanical challenges, the mechanotransducing functions of emerin are coupled to changes in its oligomeric state, and the incremental self-assembly of emerin determines nuclear shape adaptation against forces. We also show that the abnormal nuclear envelope deformations induced by EDMD emerin mutants stem from an improper formation of lamin A/C and LINC complex-stabilized emerin oligomers. These findings place emerin at the center of the molecular processes that regulate nuclear shape remodeling in response to mechanical challenges.

## 34 **Introduction**

35 Emerin is an inner nuclear membrane (INM) protein that participates in the maintenance of the  
36 nuclear architecture by interacting with the lamina and elements of the linker of the  
37 nucleoskeleton and cytoskeleton (LINC) complex(Berk et al., 2013b; Kirby and Lammerding,  
38 2018). Emerin also contributes to tethering chromatin at the nuclear envelope (NE) by binding  
39 the DNA-bridging barrier-to-autointegration factor (BAF) and regulating the activity of  
40 chromatin compaction modulators(Cui et al., 2015; Demmerle et al., 2012). Both the  
41 nucleoskeleton and the compaction state of chromatin contribute to the mechanical responses of  
42 nuclei and emerin is deemed a pivotal actor of mechanotransducing processes at the NE(Maurer  
43 and Lammerding, 2019). When mutated or absent, emerin causes X-linked Emery-Dreifuss  
44 muscular dystrophy (EDMD), a disease part of a larger of group of laminopathies associated  
45 with structural perturbations of the NE and its underlying lamina(Emery and Dreifuss, 1966).  
46 While emerin is ubiquitously expressed, mutations in the *EMD* gene primarily affect cells  
47 exposed to extensive mechanical stress, such as skeletal and cardiac muscle cells. Emerin-null  
48 muscle tissues display deformed and disorganized nuclei, impaired myogenesis and improper  
49 muscle fiber formation, which participate in the muscle wasting and cardiac disease phenotypes  
50 of EDMD(Fidzianska and Hausmanowa-Petrusewicz, 2003). In non-muscle cells, loss of emerin  
51 also induces altered NE elasticity and increased nuclear fragility(Rowat et al., 2006), impaired  
52 expression of mechanosensitive genes and enhanced apoptosis after mechanical  
53 strain(Lammerding et al., 2005). EDMD phenotypes might stem from both an altered structural  
54 integrity of the NE and modified gene expression profiles.

55 The structure of emerin and its binding to various partners have been extensively  
56 characterized(Berk et al., 2013b). Emerin is 254 amino acids (aa) long, with a N-terminal  
57 globular LAP2-emerin-MAN1 domain (LEM, aa:1-45), followed by a long intrinsically  
58 disordered region (IDR, aa:46-222) and a C-terminal transmembrane domain (aa:223-234) that  
59 allows anchoring to the NE. Prominent binding partners of emerin include lamin A/C and lamin  
60 B(Clements et al., 2000; Sakaki et al., 2001), actin(Fairley et al., 1999), BAF(Lee et al., 2001),  
61 nesprins and SUN proteins from the LINC complex(Haque et al., 2010; Mislow et al., 2002) and  
62 other factors(Berk et al., 2013b). While binding of emerin to BAF takes place via the LEM  
63 domain, interactions with other partners and emerin self-association are mediated by the  
64 IDR(Berk et al., 2014; Herrada et al., 2015). Emerin can indeed oligomerize via IDR segments

65 that serve as LEM binding and self-assembly sites between emerin monomers, and, in vitro,  
66 emerin self-association into filamentous structures impacts binding to lamin A/C and BAF(Berk  
67 et al., 2014; Samson et al., 2017). Post-translational modifications of emerin also influence its  
68 oligomerization and its interactions with binding partners(Berk et al., 2013a; Roberts et al.,  
69 2006). In isolated nuclei, phosphorylation of emerin residues Y74 and Y95 are required for lamin  
70 A/C recruitment to the LINC complex and NE stiffening in response to mechanical  
71 loads(Guilluy et al., 2014). Additional post-translational modifications regulate the affinity of the  
72 LEM domain to BAF(Berk et al., 2013a) and binding to actin(Hirano et al., 2005). How emerin  
73 organizes at the NE and participates in protecting the nucleus against mechanical strains remains  
74 unclear.

75 EDMD often involves frame-shift deletions and nonsense mutations that effectively ablates  
76 emerin expression in cells. Yet, a few sets of point mutations and deletions, including  $\Delta 95-99$ ,  
77 Q133H and P183H/T, also cause EDMD despite the localization of these mutated emerin at the  
78 NE and normal cellular expression levels(Fairley et al., 1999; Holt et al., 2001). These mutants  
79 display altered self-association and binding to nucleoskeletal proteins in vitro(Berk et al., 2013b;  
80 Herrada et al., 2015) and possible changes in their molecular organizations at the NE might  
81 explain why they induce EDMD.

82 Here, we used super-resolution imaging by direct stochastic optical reconstruction microscopy  
83 (dSTORM)(van de Linde et al., 2011) and single particle tracking by photoactivated localization  
84 microscopy (sptPALM)(Subach et al., 2010) to investigate the nanoscale organization of wild-  
85 type and mutant emerin in cells. By modulating the mechanical landscape of nuclei using cell  
86 micropatterning techniques(Fernandez et al., 2017), we also studied how emerin participates in  
87 NE mechanotransduction processes during stress. We show that emerin oligomerization and its  
88 differential interactions with key structural partners at the NE is central to nuclear shape  
89 adaptation against mechanical challenges.

90  
91

## 92 **Results**

### 93 **Emerin displays distinct diffusive behaviors at the nuclear envelope**

94 To study the NE dynamics of wild-type and dystrophy causing mutations of emerin, PA-  
95 TagRFP-emerin fusions were expressed in emerin-null human dermal fibroblasts (HDF) from an

96 EDMD patient ( $EMD^{-/y}$ ). PA-TagRFP-emerin expression led to its expected localization at the  
97 NE, as observed for endogenous emerin in HDF from a healthy individual ( $EMD^{+/y}$ ) (Fig. 1A).  
98 Upon re-expression of wild-type emerin fusions in  $EMD^{-/y}$  HDF, nuclear deformations against  
99 mechanical stress recovered to levels similar to wild-type  $EMD^{+/y}$  HDF (Bautista et al., 2019).  
100 For sptPALM, individual PA-TagRFP-emerin were imaged using highly inclined and laminated  
101 optical sheet excitation at the ventral NE (Tokunaga et al., 2008). Diffusion tracks were generated  
102 from localized emerin appearances (Fig. 1B; Movie S1) and analyses were performed using the  
103 probability distribution of square displacements (PDSD) (Schutz et al., 1997) to separate unique  
104 diffusive behaviors (Fig. 1C).

105 We observed that wild-type emerin exhibits four distinct diffusive behaviors with diffusion  
106 coefficients  $D_1: 2.21 \times 10^{-1} \pm 4.9 \times 10^{-2} \mu\text{m}^2\text{s}^{-1}$ , a value similar to that reported for ER membrane  
107 diffusion (Ostlund et al., 1999),  $D_2: 1.48 \times 10^{-2} \pm 1.5 \times 10^{-3} \mu\text{m}^2\text{s}^{-1}$ ,  $D_3: 1.73 \times 10^{-3} \pm 1.1 \times 10^{-4} \mu\text{m}^2\text{s}^{-1}$ ,  
108 and  $D_4: 2.6 \times 10^{-4} \pm 1 \times 10^{-5} \mu\text{m}^2\text{s}^{-1}$  (Fig. 1D; Table S1). The ER population  $D_1$  makes up 1% of the  
109 detected behaviors, while population  $D_2$  represents 9%, a small emerin fraction comparable to  
110 that expected at the outer nuclear membrane (ONM) (Salpingidou et al., 2007). The two slowest  
111 populations  $D_3$  and  $D_4$  collectively represent 90% of emerin diffusive behaviors. Based on their  
112 individual diffusion coefficient, we grouped emerin trajectories into four diffusion ranges and  
113 plotted them as maps. In trajectory maps, the fastest emerin population  $D_1$  primarily distributes  
114 in the vicinity of the NE, consistent with diffusion in the ER membrane, while the three slower  
115 populations  $D_{2-4}$  are enriched at the NE (Fig. 1E). Compared to measurements by fluorescence  
116 recovery after photobleaching, where only two diffusive behaviors of emerin were detected (Fig.  
117 S1), sptPALM reveals that emerin has four distinct types of diffusions.

118

### 119 **Emerin organizes as slowly diffusing monomers or oligomers at the inner nuclear** 120 **membrane**

121 While emerin primarily localizes at the INM, it is often detected at the ONM, where it does not  
122 interact with the nuclear lamina. To assess if diffusing population  $D_2$  corresponds to ONM-  
123 associated emerin, sptPALM was done after lamin A/C depletion by siRNA (Fig. S2).  
124 Downregulating the expression of lamin A/C did not affect emerin populations  $D_1$  and  $D_2$  ( $p$  not  
125 significant, Fig. 2A) but the mobility of populations  $D_3$  (40%) and  $D_4$  (50%) increased ( $p < 0.01$ ,  
126 Fig. 2A; Table S1), consistent with their localization at the INM and with population  $D_2$

127 diffusing at the ONM. Commensurate with the majority of emerin being distributed as two  
128 distinct INM pools, nuclear actin depletion by downregulating the expression of the actin nuclear  
129 import factor importin-9(Dopie et al., 2012) (IPO9, Fig. S2-S3) also resulted in the increased  
130 mobility of populations D<sub>3</sub> and D<sub>4</sub>, although faster emerin diffusion at the ONM was also  
131 observed, for equivocal reasons (Fig. 2A; Table S1). The 9% fraction of emerin diffusing at the  
132 ONM agreed well with quantitative immunostaining measurements indicating that 13±6% of the  
133 emerin pool localizes at the ONM in *EMD*<sup>+/-y</sup> HDF (Fig. S4).

134 Emerin can self-assemble in vitro, which could induce its slow INM mobility if emerin  
135 oligomers are tethered by the nucleoskeleton. To determine if diffusing populations D<sub>3</sub> or D<sub>4</sub>  
136 correspond to emerin monomers or oligomers, we co-expressed wild-type emerin fused to self-  
137 complementary split-GFP fragments (Fig. 2B), induced the formation of complemented emerin-  
138 GFP-emerin species and tracked their mobility by complementation activated light microscopy  
139 (CALM)(Pinaud and Dahan, 2011). We found that emerin-GFP-emerin species localize almost  
140 exclusively at the NE (Fig. 2C; Movie S2), with 90% diffusing like population D<sub>4</sub> (*p* not  
141 significant, Fig. 2D) and 10% diffusing like the ONM population D<sub>2</sub> (*p* not significant, Fig. 2D).  
142 No fluorescent species with mobility matching those of the ER population D<sub>1</sub> or the INM  
143 population D<sub>3</sub> were detected. Emerin-GFP-emerin trajectories often spatially overlap, suggesting  
144 that emerin forms multimers rather than strictly dimers at the INM (Fig. 2C). This indicates that  
145 population D<sub>3</sub> detected by sptPALM but not by CALM represents emerin monomers, while the  
146 slowest population D<sub>4</sub> represents INM emerin oligomers, as subsequently confirmed by super-  
147 resolution imaging. The detection of a few emerin-GFP-emerin species at the ONM is likely due  
148 to split-GFP-induced emerin dimers that cannot translocate through peripheral nuclear pore  
149 channels and do not access the INM.

150

### 151 **BAF binding modulates the mobility of both emerin monomers and oligomers distributed** 152 **across the inner nuclear membrane.**

153 BAF binds the LEM domain of emerin with high affinity and could participate in the slow INM  
154 diffusion of emerin via its additional interactions with lamin A/C(Samson et al., 2018) and  
155 chromatin(Burger et al., 2020). To study how binding of emerin to BAF influences its mobility,  
156 endogenous BAF was depleted by siRNA (Fig. S2) and replaced by the expression of BAF<sup>L58R</sup>, a

157 mutant that does not bind LEM domains but binds lamin A/C and chromatin(Samwer et al.,  
158 2017). When unable to bind BAF<sup>L58R</sup>, emerlin monomers and oligomers diffuse significantly  
159 faster at the INM, with lateral mobilities higher than for lamin A/C or IPO9 knockdown ( $p<0.01$ ,  
160 Fig. 2A; Table S1). While emerlin diffusion at the ER is undisturbed, its ONM mobility increases  
161 ( $p<0.01$ , Fig. 2A), suggesting that cytoplasmic BAF also interacts with emerlin at the ONM. BAF  
162 being highly mobile in the nucleus(Shimi et al., 2004), the comparatively slow mobility of BAF-  
163 bound emerlin likely stems from the formation of ternary complexes with lamin A/C or  
164 chromatin. As knockdown of endogenous BAF and expression of BAF<sup>L58R</sup> did not alter the  
165 expression of lamin A/C nor its nuclear localization (Fig. S2), the stronger influence of BAF<sup>L58R</sup>  
166 on emerlin dynamics as compared to lamin A/C depletion indicates that BAF not only modulates  
167 the mobility of emerlin via ternary binding to lamin A/C, but also via additional interactions with  
168 other nuclear components, potentially chromatin.

169 The global influence of BAF and the nucleoskeleton on the mobility of emerlin was also captured  
170 in diffusion maps built by spatial rendering of diffusion coefficients at the position of each  
171 tracked PA-tagRFP-emerlin (Fig. 2E). In those map, slow diffusion domains attributed to emerlin  
172 oligomers are distributed throughout the NE and are surrounded by areas where the mobility of  
173 emerlin is faster, as expected for monomers (Fig. 2E). This indicates a membrane-wide, yet  
174 locally structured distribution of emerlin, with monomers surrounding oligomer domains,  
175 consistent with emerlin monomer/oligomer exchanges in distinct INM areas. Together, these  
176 results show that emerlin diffuses rapidly at the ER membrane on its way to the juxtaposed ONM,  
177 where its diffusion is slower, in part by interaction with cytoplasmic BAF. Once at the INM, the  
178 mobility of emerlin is further reduced, with monomers and oligomers interacting with nuclear  
179 BAF and the nucleoskeleton, consistent with a combined BAF-induced and lamina-induced  
180 retention of emerlin at the INM.

181

### 182 **Emerlin forms discrete oligomeric nanodomains surrounded by monomers**

183 We then probed the organization of emerlin in greater detail using super-resolution microscopy.  
184 Wild-type emerlin fused to a SNAP-tag was expressed in *EMD*<sup>-y</sup> HDF and imaged at the ventral  
185 NE by dSTORM with benzylguanine-AlexaFluor647 (Fig. 3A). Emerlin neighborhood density  
186 functions (NDF) built from localized emerlin positions were compared to MonteCarlo  
187 simulations of completely random distributions and fitted to measure molecular densities and



188 length scales of significant clustering. We found that wild-type emerin is not distributed  
189 randomly at the NE, as it displays density distributions significantly higher than expected for a  
190 completely random organization (Fig. 3B). NDF were best fitted with a two-exponential decay  
191 model, indicating that emerin organizes into two distinct clustering states across the NE. The first  
192 clusters have typical sizes of  $22\pm 11$  nm and molecular densities of emerin  $8.2\pm 0.2$  fold higher  
193 than expected for a random distribution (Fig. 3C; Table S2). The second clusters are significantly  
194 larger with typical sizes of  $236\pm 30$  nm and emerin densities slightly above the expected value of  
195 1 for complete randomness ( $1.3\pm 0.1$  fold, Fig. 3C). In local cluster maps, emerin forms small  
196 high-density clusters bordered by larger NE areas with emerin densities close to random (Fig.  
197 3D). Those distributions are similar to sptPALM diffusion maps and corroborate that emerin  
198 organizes into discrete oligomers surrounded by dispersed emerin monomers across the INM. A  
199 similar organization of emerin was observed at the dorsal NE (Fig. S5). While it is intriguing that  
200 emerin monomers appear slightly clustered, their completely random distribution is not expected  
201 because they do not populate membrane-less areas of the NE, such as nuclear pores.

202

### 203 **Emerin oligomers are stabilized by lamin A/C and SUN1 at LINC complexes and are** 204 **modulated by nuclear actin and BAF**

205 We then determined how lamin A/C, nuclear actin, BAF and SUN1 from the LINC complex  
206 participate in the spatial organization of emerin at the INM. Wild-type emerin was imaged by  
207 dSTORM after siRNA knockdown of lamin A/C, IPO9, SUN1, or replacement of endogenous  
208 BAF with BAF<sup>L58R</sup>. After lamin A/C depletion, the molecular density of emerin is reduced (Fig.  
209 3B) and emerin distributes into  $35\pm 17$  nm nanodomains with densities close to random ( $1.2\pm 0.1$   
210 fold, Fig. 3C; Table S2) and into large  $950\pm 173$  nm monomer domains with densities just above  
211 random ( $1.1\pm 0.1$  fold, Fig. 3C). Compared to controls, emerin monomers are dispersed over  
212 larger areas and oligomers nearly vanish, as seen in emerin cluster maps of lamin A/C-depleted  
213 nuclei (Fig. 3E). The spatial distribution of emerin and oligomerization returned to near normal  
214 levels upon exogenous expression of a siRNA-resistant lamin A/C (Fig. 3C and S6), but  
215 overexpression induced a loss of emerin oligomers (Fig. S6), indicating that balanced levels of  
216 lamin A/C are essential to promote emerin self-assemblies. Although lamin A/C depletion  
217 indirectly led to decreased nuclear actin levels (Fig. S2), emerin oligomers were not as severely  
218 disrupted when nuclear actin was specifically depleted, as shown next. These results indicate that

219 lamin A/C plays a central role for the formation and the stabilization of emerin oligomers and  
220 additionally influences the spatial distribution of emerin monomers at the INM.

221 When nuclear actin is depleted after IPO9 knockdown, emerin forms oligomers having reduced  
222 molecular densities of  $3.6 \pm 0.1$  fold above random and sizes of  $65 \pm 13$  nm (Fig. 3C; Table S2).  
223 Emerin monomers are dispersed over  $382 \pm 81$  nm domains, larger than in untreated cells ( $236 \pm 30$   
224 nm, Fig. 3C), but not as large as for lamin A/C depletion ( $950 \pm 173$  nm, Fig. 3C). Thus, despite  
225 reduced nuclear actin levels, emerin still oligomerizes but redistributes over broader INM  
226 domains. Conversely, nuclear accumulation of actin by siRNA of exportin 6 (XPO6, Fig. S3) did  
227 not affect the organization of emerin monomers, but oligomer densities decreased to  $1.5 \pm 0.1$  fold  
228 above random in  $49 \pm 16$  nm nanodomains (Fig. S7), suggesting that excess nuclear actin impedes  
229 the formation of dense emerin oligomers. Thus, together with lamin A/C, nuclear actin  
230 contributes to the spatial organization of emerin at the INM and participates in the maintenance  
231 of emerin oligomers.

232 When endogenous BAF is replaced by BAF<sup>L58R</sup>, emerin oligomers are still formed but with  
233 reduced molecular densities of  $2.0 \pm 0.1$  fold above random and larger sizes of  $85 \pm 19$  nm  
234 compared to controls (Fig. 3C; Table S2). The inability to bind BAF also induces a redistribution  
235 of emerin monomers over large INM domains with typical sizes of  $718 \pm 250$  nm (Fig. 3C).  
236 Consistent with our diffusion results, emerin binding to BAF modulates the organization of both  
237 oligomeric and monomeric emerin and strongly influences the spatial distribution of emerin  
238 monomers at the INM.

239 When SUN1 is depleted to destabilize LINC complexes (Fig. S2), the formation of emerin  
240 oligomers is reduced to levels equivalent to lamin A/C depletion. Emerin distributes over  $75 \pm 41$   
241 nm nanodomains with molecular densities decreased to  $1.2 \pm 0.1$  fold above random (Fig. 3F;  
242 Table S2), and over NE areas with sizes of  $268 \pm 110$  nm, similar to the spatial distribution of  
243 emerin monomers in untreated cells (Fig. 3F). This indicates that reduced SUN1 expression  
244 levels primarily influence the formation of emerin oligomers at the INM. In cluster maps,  
245 depletion of SUN1 effectively results in a largely random distribution of emerin and, like for  
246 lamin A/C depletion, few emerin clusters are visible (Figure 3G). This loss of emerin oligomers  
247 was partially rescued upon expression of an exogenous and siRNA-resistant EGFP-SUN1 (Fig.  
248 3F and Fig. S6), but overexpression induced a mis-localization of both EGFP-SUN1 and emerin  
249 from the NE (Fig.S6) and a concomitant reduction in emerin oligomerization (Fig. S6),



250 indicating that, as for lamin A/C, a balanced cellular expression of SUN1 is required for the self-  
251 assembly of emerin at the INM. While SUN1 interacts with lamin A (Crisp et al., 2006; Haque et  
252 al., 2006), the expression and NE localization of lamin A/C was not disrupted by SUN1  
253 knockdown and, reciprocally, lamin A/C depletion did not modify the expression of SUN1 nor  
254 its distribution at the NE (Fig. S2). Thus, together with lamin A/C, a regulated expression of  
255 SUN1 is required for the formation of emerin oligomers and their localized distribution at the  
256 INM. SUN1, itself, was shown to self-assemble into nearly immobile platforms that could serve  
257 as sites for macromolecular assemblies at LINC complexes (Hennen et al., 2018; Lu et al., 2008).  
258 To assess if emerin locally oligomerizes at LINC complexes, we expressed a dominant negative  
259 KASH domain of nesprin-1 $\alpha$  (mCherry-DN-KASH) (Lombardi et al., 2011), which disrupts  
260 LINC complexes by binding to SUN proteins and impeding their interaction with endogenous  
261 KASH-domain proteins at the NE. In cells expressing mCherry-DN-KASH, emerin oligomers  
262 were disrupted at levels equivalent to those of SUN1 siRNA (Fig. 3C; Table S2), indicating that  
263 the oligomerization of emerin requires a functional coupling of the nucleoskeleton and the  
264 cytoskeleton via SUN1/nesprin interactions at LINC complexes.

265 Together, these results show that emerin monomers are distributed across the INM where their  
266 distribution is modulated by direct binding to BAF and additional spatial constraints imposed by  
267 lamin A/C and nuclear actin. Emerin also self-assembles into discrete and small oligomeric  
268 nanodomains that are structurally co-stabilized at the LINC complex by lamin A/C and SUN1  
269 and are maintained, to a lesser extent, by BAF and nuclear actin.

270

## 271 **Increased diffusion and oligomerization of emerin upon nuclear adaptation to mechanical** 272 **stress**

273 We then studied how the mobility of emerin and its organization change in nuclei subjected to  
274 increasing mechanical stress. SptPALM and super-resolution imaging of wild-type emerin were  
275 done in *EMD*<sup>-y</sup> HDF grown on increasingly narrow rectangular micropatterns with widths of 15-  
276 5  $\mu\text{m}$  to impose steady-state mechanical stress to the nucleus (Fig. 4A-B) and increase  
277 mechanical loads at LINC complexes (Arsenovic et al., 2016). First, we verified that changes in  
278 nuclear shape index (NSI) on these micropatterns reflect the mechanical adaptation of nuclei  
279 against forces by depleting lamin A/C or nuclear actin, two key nucleoskeletal proteins involved

280 in maintaining nuclear shape. In non-patterned cells, nuclei are less circular after lamin A/C or  
281 nuclear actin depletion compared to controls ( $p < 0.01$ , Fig. 4C). These effects are amplified on  
282 micropatterns where nuclei become increasingly deformed as patterns get narrower ( $p < 0.01$ , Fig.  
283 4C), indicating that cell micropatterning elicits increased nuclear stress and effectively induces  
284 mechanical responses that implicate the nucleoskeleton.

285 When we tracked wild-type PA-tag-RFP-emerin on deformed nuclei in 15  $\mu\text{m}$  and 10  $\mu\text{m}$   
286 patterns (Movie S3), we found that its ER mobility is unchanged compared to non-patterned cells  
287 ( $p$  not significant, Fig. 4D; Table S1), while its diffusion at the ONM is faster ( $p < 0.01$ , Fig. 4D).  
288 At the INM, emerlin monomers also diffuse significantly faster ( $p < 0.01$ , Fig. 4D) and the  
289 mobility of oligomers increases, albeit short of statistical significance for 15  $\mu\text{m}$  patterns ( $p$  not  
290 significant and  $p < 0.01$ , Fig. 4D). Interestingly, there was no significant difference in the mobility  
291 of all four ER, ONM and INM emerlin populations in both types of micropatterns compared to  
292 nuclear actin depletion ( $p$  not significant, Fig. S8), suggesting that nuclear shape adaptation to  
293 mechanical cues entails modified interactions of emerlin with nuclear actin, notably for  
294 monomers.

295 Spatial distribution analyses further indicate that, as the NSI decreases, emerlin monomers  
296 disperse over increasingly large INM domains with sizes of  $382 \pm 62$  nm and  $460 \pm 136$  nm,  
297 compared to  $236 \pm 30$  nm for non-stressed nuclei (Fig. 4E). Concurrently, oligomer densities drop  
298 from  $8.2 \pm 0.2$  fold to  $3.6 \pm 0.1$  fold above random in 15  $\mu\text{m}$  patterns, before increasing to  $4.6 \pm 0.1$   
299 fold above random in 10  $\mu\text{m}$  patterns (Fig. 4E). Remarkably, oligomeric nanodomains become  
300 larger during nuclear stress and their size expands from  $22 \pm 11$  nm to  $60 \pm 13$  nm in both  
301 micropatterns (Fig. 4E). When considering this wider spatial distribution, the relative  
302 oligomerization of emerlin compared to non-deformed nuclei increases by 3.4 fold and by 4.1  
303 fold as the nucleus adapts to incremental mechanical stress (Fig. 4F). This shows that nuclear  
304 shape adaptation to forces is associated with a gradual change in the oligomerization potential of  
305 emerlin at the INM. This increased self-assembly of emerlin over larger nanodomains is  
306 accompanied by a faster lateral mobility of emerlin and is triggered by nucleoskeletal re-  
307 arrangements. Indeed, the stress-induced spatial reorganizations of emerlin in micropatterns,  
308 including oligomer densities and emerlin domain sizes, are analogous to those seen when nuclear  
309 actin is depleted in non-patterned cells (Fig. S8; Table S2). Consistent with the contribution of  
310 nuclear actin to changes in nuclear volume (Baarlink et al., 2017), these observations suggest that

311 nuclear shape deformation involves a disengagement of nuclear actin from the nucleoskeleton  
312 that results in faster emerin diffusion and increased oligomerization. Increased lateral mobilities  
313 of emerin at the INM could indeed facilitate molecular collisions between monomers and the  
314 formation of oligomers stabilized by lamin A/C and SUN1 at LINC complexes. These results  
315 indicate that the mechanotransducing functions of emerin are coupled to changes in its  
316 oligomeric state along the INM and are modulated by emerin interactions with nucleoskeletal  
317 partners, including nuclear actin, to ensure appropriate nuclear deformation and response to  
318 mechanical challenges.

319

### 320 **Emerin mutants induce abnormal nuclear deformation against mechanical stress**

321 To further establish the significance of emerin oligomerization for nuclear adaptation to  
322 mechanical stress, we then compared the organization of wild-type emerin with that of mutated  
323 forms of emerin known to induce EDMD. We studied how mutation Q133H, deletion  $\Delta 95-99$ ,  
324 and mutation P183H (Fig. 5A) affect the diffusion and the nanoscale distribution of emerin at the  
325 NE. First, we verified that these mutated emerin effectively induce defective mechanical  
326 responses of nuclei when expressed in *EMD*<sup>-/-</sup> HDF by comparing changes in NSI after random  
327 cell plating or plating on increasingly narrow micropatterns (Fig. 5B-C). In randomly plated  
328 cells, the expression of mutated emerin results in slightly less circular nuclei compared to wild-  
329 type emerin (Fig. 5B). With increasing mechanical stress, cells expressing emerin mutants  
330 display significantly higher NSI than wild-type (Fig. 5B), indicative of a failure to correctly  
331 modify the shape of the nucleus in response to forces. These deficient changes in nuclear shape  
332 are accompanied by a mispositioning of the nucleus relative to the cell major axis, nucleus  
333 crumpling, abnormal organization of the actin cytoskeleton and failure of cells to properly fit  
334 within micropatterns, specifically in cell areas adjacent to the misshaped nucleus (Fig. 5C). It  
335 indicates that expression of mutated emerin in *EMD*<sup>-/-</sup> HDF effectively impedes nuclear  
336 adaptation to mechanical stress.

337

### 338 **Emerin mutants display defective oligomerization at the inner nuclear membrane**

339 **Q133H mutation.** We then characterized the NE dynamics of each mutated emerin and their  
340 respective nanoscale organization, starting with Q133H emerin. We found that the lateral

341 mobility of Q133H PA-TagRFP-emerin is similar to that of wild-type emerin at the ER and the  
342 ONM ( $p$  not significant, Fig. 6A; Table S1), but that both Q133H monomers and oligomers  
343 diffuse significantly faster at the INM ( $p < 0.01$  and  $p < 0.05$ , Fig. 6A). Previous in vitro studies  
344 indicated that the Q133H mutation disrupts emerin binding to actin (Holaska et al., 2004) but  
345 does not impede interactions with lamin A/C (Holt et al., 2001), SUN1 (Haque et al., 2010) or  
346 BAF (Bengtsson and Wilson, 2004). The increased INM diffusion of Q133H, therefore suggests  
347 that it does not bind nuclear actin. Interestingly, this faster INM diffusion of Q133H resembles  
348 the increased mobility of wild-type emerin when nuclear actin is depleted (Fig. 2A), which  
349 further underlines that nucleoskeletal actin modulates the diffusion of emerin monomers and  
350 oligomers. This is consistent with previous observations that emerin expression influences the  
351 mobility of nuclear actin (Ho et al., 2013) and indicative of a reciprocal effect of emerin/nuclear  
352 actin interactions on their respective mobility. The diffusion of Q133H at the INM is also similar  
353 to that of wild-type emerin under mechanical stress, in both 15  $\mu\text{m}$  and 10  $\mu\text{m}$  wide  
354 micropatterns ( $p$  not significant, Fig. S8), which supports a mechanism where nuclear  
355 deformations involve a dissociation of emerin from nuclear actin that leads to faster emerin  
356 diffusion at the INM.

357 Although, it was reported that Q133H has a reduced capacity to self-assemble in vitro (Herrada et  
358 al., 2015), its spatial distribution and cluster maps show that it organizes into monomers and  
359 oligomers across the INM (Fig. 6B-C). Like wild-type emerin, Q133H monomers are distributed  
360 in  $213 \pm 62$  nm membrane domains (Fig. 6B), an indication that the inability to bind nuclear actin  
361 increases the mobility of Q133H monomers but does not affect their overall spatial distribution at  
362 the INM. Q133H also maintain the ability to self-assemble at the INM where it forms oligomeric  
363 clusters having sizes of  $19 \pm 12$  nm, comparable to the  $22 \pm 11$  nm size of wild-type emerin  
364 oligomers, but with molecular densities  $12.2 \pm 0.2$  fold above random (Fig. 6B-C; Table S2). This  
365 50% increase in oligomerization compared to wild-type indicates that deficient binding of  
366 Q133H to nucleoskeletal actin leads to a disproportionate self-assembly of emerin into  
367 oligomeric nanodomains. It also implies that direct binding to nuclear actin normally reduces the  
368 oligomerization potential of wild-type emerin, consistent with our observation that excessive  
369 nuclear accumulation of actin impedes the formation of emerin oligomers at the INM (Fig. S7).

370

371  **$\Delta 95-99$  mutation.** When we performed similar studies with  $\Delta 95-99$  emerin, we found that  
372 diffusions at the ER membrane and the ONM are unchanged compared to wild-type emerin ( $p$   
373 not significant, Fig. 6D; Table S1), but that lateral mobilities at the INM are significantly  
374 reduced ( $p < 0.05$  and  $p < 0.01$ , Fig. 6D), with the slowest  $\Delta 95-99$  emerin population being  
375 essentially immobile. This suggests that  $\Delta 95-99$  interacts more strongly or more frequently than  
376 wild-type emerin with some of its binding partners on the nucleoplasmic side of the NE.  
377 Previous biochemical studies have shown that the  $\Delta 95-99$  deletion disrupts emerin interactions  
378 with most of its binding partners, including lamin A/C and actin, but not BAF (Berk et al.,  
379 2013b). As BAF binding strongly influences the mobility of wild-type emerin (Fig. 2A), the  
380 reduced diffusion of  $\Delta 95-99$  at the INM could stem from repetitive interactions with BAF, as  
381 recently proposed (Samson et al., 2017). To destabilize these interactions, we attempted to track  
382  $\Delta 95-99$  in *EMD*<sup>-/-</sup> HDF knocked down for endogenous BAF and expressing BAF<sup>L58R</sup>. Co-  
383 expression of both  $\Delta 95-99$  and BAF<sup>L58R</sup>, however, proved toxic to cells, indicating that  
384 interactions between  $\Delta 95-99$  emerin and BAF are important to maintain cell viability.  
385 In addition to its slow mobility,  $\Delta 95-99$  displays defective oligomerization at the INM.  $\Delta 95-99$  is  
386 distributed randomly over large,  $420 \pm 51$  nm NE domains and in smaller,  $48 \pm 14$  nm  
387 nanodomains where the molecular density of  $1.3 \pm 0.1$  fold above random is greatly reduced  
388 compared to wild-type emerin oligomers (Fig. 6E; Table S2). Effectively,  $\Delta 95-99$  forms less  
389 dense and fewer oligomerization nanodomains in cluster maps (Fig. 6F). Thus,  $\Delta 95-99$  does not  
390 efficiently oligomerize at the INM, consistent with its impaired self-assembly in vitro and reports  
391 that the deletion lowers emerin/emerin proximity (Herrada et al., 2015). Interestingly, despite an  
392 intact lamina and the preserved ability of  $\Delta 95-99$  to bind SUN1 (Haque et al., 2010), the  
393 molecular densities and cluster maps of  $\Delta 95-99$  are similar to those of wild-type emerin when the  
394 expression of lamin A/C is reduced or when SUN1 LINC complexes are disrupted (Fig. 3C-D).  
395 This reduced oligomerization of  $\Delta 95-99$  to levels seen after lamin A/C depletion implies that  
396 direct binding to lamin A/C is required to stabilize emerin oligomers at SUN1 LINC complexes.  
397 Such a stabilizing role of lamin A/C is consistent with prior proximity ligation assays where  
398  $\Delta 95-99$  was found less close to lamin A/C than wild-type emerin (Herrada et al., 2015) and  
399 studies showing that the deletion abolishes direct lamin A/C binding to emerin (Lee et al., 2001).  
400 Together, these results show that  $\Delta 95-99$  primarily distributes at random across the INM due to  
401 its reduced self-assembly, its inability to directly bind lamin A/C and its slow mobility.

402  
403 **P183H mutation.** Like for the other emerlin mutants, the diffusion of P183H emerlin at the ER  
404 membrane and the ONM is unchanged compared to wild-type emerlin ( $p$  not significant, Fig. 6G;  
405 Table S1). However, its INM mobility is reduced for the populations attributed to monomers and  
406 oligomers ( $p < 0.05$  and  $p < 0.01$ , Fig. 6G), with the slowest P183H population being immobile.  
407 This slow diffusion resembles that observed for  $\Delta 95-99$  and again implies that P183H interacts  
408 more frequently than wild-type emerlin with some of its nucleoplasmic binding partners. In vitro,  
409 P183H binds SUN1 (Haque et al., 2010), BAF and actin (Berk et al., 2013b) and displays  
410 enhanced binding to lamin A/C compared to wild-type emerlin (Lee et al., 2001). Its reduced INM  
411 mobility might therefore be linked to an increased binding frequency to BAF, like for  $\Delta 95-99$ , or  
412 to its enhanced binding to lamin A/C. The slow diffusion of P183H could also be due to the  
413 formation of dimers as suggested based on its strong propensity to self-assemble in vitro (Herrada  
414 et al., 2015) and observations that residue P183 is positioned in the 168-186 emerlin region  
415 required to limit emerlin-emerlin association (Berk et al., 2014). To determine if P183H forms  
416 dimers, we performed tracking by CALM after co-expression of P183H fused to split-GFP  
417 fragments. Three populations of P183H-GFP-P183H emerlin species were detected: a 2%  
418 population with a mobility slightly slower than P183H at the ER membrane ( $p < 0.05$ , Fig. 6G), a  
419 larger 39% population with a mobility comparable to the ONM behavior of P183H ( $p$  not  
420 significant, Fig. 6G), and a dominant 59% population with a lateral diffusion similar to the INM  
421 population initially attributed to P183H monomers by sptPALM ( $p$  not significant, Fig. 6G;  
422 Table S1). Surprisingly, no fluorescent species with diffusion coefficient matching that of the  
423 immobile P183H oligomers are detected (Fig. 6G). The high frequency detection of  
424 complemented P183H-GFP-P183H emerlin species at both the ER membrane and the ONM  
425 indicates that P183H is indeed more prone to form dimers than wild-type emerlin before reaching  
426 the INM. This apparent biased monomer:dimer equilibrium towards dimers is maintained at the  
427 INM where it precludes an efficient association of P183H into oligomer domains, in particular if  
428 dimers are stabilized by irreversible assembly of the split-GFP fragments. This indicates that  
429 P183H has a strong propensity to form dimers that could impact oligomerization at the INM.  
430 Consistent with these observations, the dimerization of P183H leads to a significantly reduced  
431 oligomerization at the INM. P183H monomers/dimers are distributed in domains with typical  
432 sizes of  $321 \pm 29$  nm and molecular densities of  $1.3 \pm 0.1$  fold above random (Fig. 6H; Table S2).



433 Smaller,  $35\pm 12$  nm nanodomains are also observed, but their molecular density is reduced to  
434  $2.2\pm 0.1$  compared to wild-type oligomers (Fig. 6H). Indeed, while P183H can still bind lamin  
435 A/C and SUN1, it forms oligomeric domains having lower molecular density than wild-type  
436 emerin in cluster maps (Fig. 6J), indicating that the dimerization of P183H hinders further self-  
437 association into dense oligomers at the INM.

438

439

#### 440 **Abnormal reorganization of $\Delta 95-99$ emerin in response to mechanical stress**

441 To characterize the importance of emerin oligomerization for nuclear deformation and responses  
442 to mechanical stress, we also studied the nanoscale reorganization of  $\Delta 95-99$  in micropatterned  
443 cells. For deformed nuclei in  $15\ \mu\text{m}$  patterns,  $\Delta 95-99$  monomers are dispersed over large,  
444  $810\pm 215$  nm INM domains, almost double the size of monomer domains in non-stressed nuclei  
445 (Fig. 7A). However, as stress becomes more pronounced in  $10\ \mu\text{m}$  patterns, the dispersion of  
446  $\Delta 95-99$  monomers recedes, with distributions in  $499\pm 250$  nm domains (Fig. 7A). Thus, contrary  
447 to wild-type emerin, a progressive dispersion of  $\Delta 95-99$  monomers over increasingly large INM  
448 areas is not observed with growing mechanical stress, consistent with the abnormal changes in  
449 NSI induced by the deletion. The formation of emerin oligomers remains very limited, with  $\Delta 95-$   
450  $99$  molecular densities increasing slightly from  $1.3\pm 0.1$  to  $1.7\pm 0.1$  and  $2.0\pm 0.1$  fold above  
451 random in  $15\ \mu\text{m}$  and  $10\ \mu\text{m}$  micropatterns (Fig. 7A; Table S2). With the concurrent  
452 enlargement of nanodomains from  $48\pm 14$  nm to  $81\pm 16$  nm and  $75\pm 20$  nm, the relative  
453 oligomerization of  $\Delta 95-99$  compared to non-mechanically stressed nuclei increases by 3.9 fold  
454 initially, but does not rise further as nuclear stress intensifies (Fig. 7B).  $\Delta 95-99$  oligomeric  
455 nanodomains remain sparser and significantly less dense than for wild-type emerin in cluster  
456 maps of nuclei under stress (Fig. 7C). Thus, the failure of  $\Delta 95-99$  to gradually self-associate at  
457 sufficiently high molecular densities leads to defective nuclear responses to force. This  
458 underlines the importance of modulating the oligomerization of emerin as a function of  
459 mechanical stress intensity for adaptive nuclear deformations.

460

#### 461 **Discussion**

462 Combining single molecule imaging and quantitative measurements, we showed that emerin  
463 distributes as monomers and oligomers at the INM and that clinically relevant EDMD mutations  
464 induce modified emerin mobility and nanoscale organizations. The oligomerization of emerin is  
465 modulated by its ability to engage or disengage interactions with various structural elements  
466 juxtaposed to the INM, including lamin A/C, SUN1, nuclear actin and BAF. Regulated  
467 expressions of lamin A/C and SUN1, together with functional LINC complexes, are essential for  
468 the formation and the stabilization of emerin oligomers, while balanced interactions of emerin  
469 with BAF and nuclear actin further modulate its diffusion and its oligomerization potential. We  
470 also showed that the mechanotransducing functions of emerin are coupled to its oligomeric state,  
471 with the formation and maintenance of emerin oligomers being central to nuclear shape  
472 adaptation against forces. Indeed, EDMD-inducing mutations that affect the self-assembly of  
473 emerin and its binding to structural elements at the INM lead to abnormal nuclear deformations  
474 and defective nucleus positioning in response to mechanical stress.

475 While the altered in vitro binding properties of Q133H,  $\Delta$ 95-99 and P183H emerin mutants result  
476 in expected differences in organization in cells, they do not necessarily induce fully predictable  
477 changes in diffusion and distribution at the NE. In effect, via its flexible IDR, emerin appears to  
478 mediate complex interactions with itself, lamin A/C, SUN1, nuclear actin and BAF, where  
479 binding to one partner impacts oligomerization and, interdependently, affects interactions with  
480 other partners. As shown from the organization of wild-type emerin after nuclear actin depletion  
481 or accumulation and our study of Q133H emerin, binding to nuclear actin significantly  
482 influences the mobility and the oligomerization potential of emerin. Actin binding to the IDR of  
483 emerin could mask interaction domains that normally serve as LEM binding and self-association  
484 sites between emerin monomers (Berk et al., 2014). IDR masking, combined with the reduced  
485 lateral mobility of actin-bound emerin, might therefore modulate the formation of oligomers by  
486 limiting molecular collisions between emerin monomers. Consistent with the need to precisely  
487 adjust the oligomerization potential of emerin for adaptive nuclear shape deformations, increased  
488 emerin diffusion and controlled formation of emerin oligomers are coupled molecular events  
489 during nuclear adaptation against stress, as shown by our measurements in micropatterns. We  
490 thus speculate that the deficient binding of Q133H emerin to nuclear actin and its over-  
491 oligomerization at SUN1 LINC complexes are linked to the abnormal nuclear deformations  
492 observed in cells.

493 The differential interactions of emerin with its nucleoplasmic partners and their influence on its  
494 mobility and its oligomerization are also underlined by the surprisingly slow mobility of  $\Delta 95-99$   
495 emerin, which does not bind lamin A/C nor actin in vitro, but binds BAF. The 48-118 region of  
496 emerin, where  $\Delta 95-99$  is located, was suggested to act as a binding site for the LEM  
497 domain(Berk et al., 2014) and through altered region flexibility, the deletion might reduce the  
498 efficacy of such interactions, potentially causing the LEM domain to bind BAF more  
499 frequently(Samson et al., 2017). Repeated interactions of  $\Delta 95-99$  with BAF and, indirectly, with  
500 the lamina or chromatin via ternary BAF complexes, could slow its diffusion, limit molecular  
501 collisions, and impede its oligomerization by sequestering the LEM domain and reducing  
502 bridging interactions with LEM binding sites on other emerin. The  $\Delta 95-99$  deletion, within the  
503 55-132 lamin tail-binding region of emerin(Berk et al., 2014), could also prevent a stabilization  
504 of already sparse  $\Delta 95-99$  oligomers by direct lamin A/C binding. We thus postulate that the  
505 aberrant nuclear deformations against stress of cells expressing  $\Delta 95-99$  emerin stem from out of  
506 balance interactions of this mutant with BAF and its inability to form lamin A/C-stabilized  
507 oligomers at SUN1 LINC complexes.

508 A similar impediment of *in trans* interactions between the LEM domain and self-association sites  
509 along the joined IDR of P183H dimers likely result in their reduced ability to oligomerize,  
510 despite retained binding to lamin A/C and SUN1. The reported enhanced binding of lamin A/C  
511 to P183H emerin(Lee et al., 2001), in close proximity to these same self-association sites could  
512 also interfere with inter-emerin bridging interactions. In both cases, the inability of the LEM  
513 domain to access binding sites along the IDR would elicit its repeated interactions with BAF,  
514 leading to the observed slow diffusion of P183H at the INM. The defective nuclear shape  
515 adaptation to mechanical challenges of cells expressing P183H might thus arise from emerin  
516 dimerization and excessive interactions with BAF or lamin A/C that prevent an efficient  
517 formation of emerin oligomers at LINC complexes. Our observation that lamin A/C  
518 overexpression, which was previously shown to induce the nuclear accumulation of BAF(Loi et  
519 al., 2016), leads to the decreased oligomerization of wild-type emerin is indeed consistent with  
520 the need to modulate emerin/BAF/lamin A/C tripartite interactions to promote the self-assembly  
521 of emerin.

522 As we have shown, because  $\Delta 95-99$  emerin does not self-assemble into sufficiently dense  
523 oligomers at the INM, it induces aberrant nuclear shape remodeling against mechanical stress.

524 The phosphorylation of emerin residues Tyr 74 and Tyr 95 was previously shown to mediate the  
525 recruitment of lamin A/C to the LINC complex during nuclear stiffening in response to  
526 force(Guilluy et al., 2014). Our observation that  $\Delta 95-99$  fails at promoting adaptive nuclear  
527 deformation in response to mechanical cues by its reduced ability to form lamin A/C- and SUN1-  
528 stabilized oligomers is consistent with the major role played by Tyr 95 phosphorylation for  
529 emerin-mediated mechanotransduction at the NE. The abnormal organization of cytoskeletal  
530 actin in mechanically challenged cells expressing  $\Delta 95-99$ , akin to disorganizations detected with  
531 a non-phosphorylatable tyrosine 74-95FF emerin(Guilluy et al., 2014), also suggests that emerin  
532 oligomers strengthen the connection between lamin A/C, the LINC complex and cytoskeletal  
533 filaments to promote correct nucleus positioning and deformation. These data point towards a  
534 link between Tyr 95 phosphorylation, emerin oligomerization and recruitment of lamin A/C for  
535 stiffening the NE at LINC complexes, likely driven by phosphorylation-induced changes in  
536 emerin conformation(Berk et al., 2013a; Tiffit et al., 2009). It is thus possible that emerin  
537 oligomeric nanodomains are enriched in Tyr 95 phosphorylated emerin, lamin A/C and LINC  
538 complex components, while emerin monomers populate the rest of the INM, consistent with  
539 emerin enrichments in distinct nucleoskeletal “niches” at the NE(Berk et al., 2013a).

540 Taken together, these lines of evidence support a model in which, during stress responses,  
541 transient unbinding of emerin monomers from nuclear actin and BAF favors oligomerization by  
542 increasing the lateral diffusion of emerin at the INM and exposing both its LEM domain and  
543 self-association sites along its IDR for intermolecular binding between emerin at LINC  
544 complexes (Fig. 8). Within emerin oligomers, stabilization by direct interactions with lamin A/C  
545 and SUN1 and additional modulation of emerin self-association by nuclear actin and BAF likely  
546 allow for a precise regulation of the oligomerization potential and the size of emerin oligomeric  
547 nanodomains at LINC complexes, as required for adaptive nuclear deformation in response to  
548 forces transmitted by cytoskeletal filaments. The localized INM distribution of emerin  
549 oligomers, the involvement of lamin A/C and SUN1 in their stabilization, their specific  
550 disruption following LINC complex destabilization, and their reliance on a part of the emerin  
551 IDR that requires phosphorylation for the recruitment of lamin A/C to LINC complexes(Guilluy  
552 et al., 2014), indeed support the idea that they are sites where interactions between emerin, lamin  
553 A/C and LINC components are strengthened. It was recently suggested that the clustering of  
554 SUN proteins could enable them to sustain high mechanical loads at the NE during force-

555 dependent processes(Jahed et al., 2018). Emerin oligomerization at SUN1 LINC complexes,  
556 might therefore contribute to the increased connectivity between the nucleoskeleton, the NE and  
557 the cytoskeleton for anchoring the nucleus and providing force absorption contact points during  
558 nuclear deformation.

559 In response to surging mechanical stress, the incremental oligomerization of emerin in enlarged  
560 nanodomains we observed could be part of a mechanism that redistributes increasing forces over  
561 wider areas at LINC complexes to maintain a basal membrane pressure at these anchoring points  
562 between the nucleoskeleton, the NE and the cytoskeleton. Beyond this central role played by  
563 emerin self-assemblies, emerin might have additional functions outside these anchoring  
564 oligomeric nanodomains. For instance, the disengagement of emerin monomers from nuclear  
565 actin likely reduces NE contacts with the nucleoskeleton, while some membrane connectivity  
566 with nuclear chromatin is maintained, via BAF. Indeed, both the nucleoskeleton and chromatin  
567 tethering to the NE participate in nuclear mechanics(Stephens et al., 2017). Together,  
568 strengthening the connections between the NE, the lamina and the cytoskeleton at LINC  
569 complexes, but partially relaxing them in the rest of the membrane could provide means to  
570 couple controlled nuclear deformation with nucleus positioning in cells. As we showed, such  
571 coupling is defective with emerin mutants.

572 Additional cross-correlative studies will be needed to further define how the structural  
573 interdependencies between emerin monomers, emerin oligomers, SUN1, BAF, and key  
574 nucleoskeletal elements spatially regulate INM/lamina and INM/chromatin contacts and  
575 reinforce the connections between the NE and the cytoskeleton at LINC complexes during  
576 nuclear responses to force. At the center of these processes, emerin diffusion and  
577 monomer/oligomer exchanges provide a means to transduced mechanical cues throughout the  
578 entire NE, for coordinated changes in local nuclear stiffness and remodeling of the nuclear shape.

579

580

## 581 **Materials and Methods**

### 582 **Cell culture, emerin expression and cell staining**

583 Emerin-null human dermal fibroblast (*EMD*<sup>-y</sup> HDF) and normal dermal fibroblasts (*EMD*<sup>+y</sup>  
584 HDF) were kindly provided by Dr. Howard Worman, Columbia University, USA, and regularly

585 tested for contaminations. *EMD*<sup>-y</sup> HDF are derived from a male EDMD patient (G-9054) and  
586 carry a 59 nucleotide deletion within the *EMD* gene (*EMD* g.329del59) that ablates emerin  
587 expression (Talkop et al., 2002). HDF were grown in DMEM (Lonza) with 10% fetal bovine  
588 serum (Gibco-Life Technologies), 50 units ml<sup>-1</sup> penicillin and 50 µg ml<sup>-1</sup> streptomycin and  
589 maintained at 37°C in a humidified atmosphere with 5% CO<sub>2</sub>.

590 Human wild-type emerin cDNA was kindly provided by Dr. Juliet Ellis, University College  
591 London, UK. For the expression of PA-TagRFP-emerin, a pEGFP-N1 plasmid backbone  
592 encoding emerin fused to the C-terminus of PA-TagRFP was produced by XbaI and KpnI  
593 insertion and PCR fusion of the human emerin cDNA. Cells plated on fibronectin-coated glass  
594 coverslips were transfected with PA-TagRFP-emerin using X-tremeGENE HP (Roche). 48-72  
595 hours post-transfection, live cells were imaged by sptPALM in HBSS buffer at 37°C. For  
596 micropatterning experiments, cells grown on 6-well plates were trypsinized after 48-72 hours of  
597 transfection and plated on fibronectin-micropatterned coverslips.

598 To express SNAP-emerin, human emerin was first fused to the C-terminus of a SNAP tag by  
599 AscI and XhoI insertion in a pSNAP-tag(m) plasmid (NEB). SNAP-emerin was then subcloned  
600 into a modified pFUW lentiviral vector by NheI and AgeI insertion. Lentiviral particles for the  
601 expression SNAP-emerin were produced by the UCLA Vector Core. Transduction of HDF  
602 grown at 70% confluence on 6-well plates was done for 48 hours, using 25 ng ml<sup>-1</sup> of lentiviral  
603 particles in complete growth medium containing 8 µg ml<sup>-1</sup> of polybrene, after which the medium  
604 was replaced. Following another 24 hours incubation, cells were trypsinized, and plated on  
605 fibronectin-coated or fibronectin-micropatterned coverslips. For imaging, cells were fixed with  
606 4% paraformaldehyde in PBS for 15 min, permeabilized with 0.1% Triton X-100 (Sigma-  
607 Aldrich) for 15 min and blocked with 4% bovine serum albumin (BSA, Sigma-Aldrich) + 0.1%  
608 Tween-20 (Sigma-Aldrich) for 30 min, at room temperature. Cells were then stained with 1 µM  
609 of SNAP-Surface-AlexaFluor 647 (BG-A647, NEB) in 4% BSA + 0.1% Tween-20 for 1 hour at  
610 37°C, then thoroughly washed before super-resolution imaging.

611 For the expression of sGFP-emerin, humanized cDNA for split-GFP 1-10 (Pinaud and Dahan,  
612 2011) was inserted by NheI and XbaI digestion in the pEGFP-N1 plasmid backbone encoding  
613 emerin, and expressed as an N-terminal fusion to emerin. The shorter 11<sup>th</sup> β-sheet M3  
614 fragment (Pinaud and Dahan, 2011) was also fused to the N-terminus of emerin by PCR cloning  
615 using primers encoding the M3 fragment sequence and subcloning into the pEGFP-N1 backbone



616 via NheI and XhoI digestions. Both plasmids were co-transfected in HDF using X-tremeGENE  
617 HP (Roche) as described for PA-TagRFP-emerin, and cells were imaged by CALM 48-72 hours  
618 post-transfection. All constructs were verified by sequencing.

619 For immunostaining of emerin, cells were grown on coverslips, fixed and permeabilized as  
620 described for SNAP-emerin staining. Cells were labeled with a rabbit anti-emerin antibody  
621 (1:500, Santa Cruz Biotechnology, sc-15378) for 45 min, washed in PBS and further labeled  
622 with a goat anti-rabbit Alexa fluor 488 antibody (1:400, Invitrogen) for 45 min. After washing,  
623 cells were mounted in a DAPI-Fluoromount G (Electron Microscopy Sciences) and imaged by  
624 confocal microscopy.

625 To label cytoplasmic actin and measure nuclear shape indices, cells were fixed with 4%  
626 paraformaldehyde in PBS for 15 min, permeabilized with 0.1% Triton X-100 for 10 min, and  
627 blocked with 4% bovine serum albumin + 0.1% Tween-20 for 1 hour. Cells were stained with  
628 phalloidin-iFluor 488 (1:1000, Abcam) for 1 hour, washed with PBS, mounted in DAPI-  
629 Fluoromount G and imaged by confocal or wide field microscopy.

630

### 631 **Mutations, siRNA and exogenous protein expressions**

632 Emerin mutations Q133H and P183H were introduced in PA-TagRFP-emerin, SNAP-emerin,  
633 and emerin fused to both split-GFP fragments by site-directed mutagenesis using QuickChange  
634 Lightning Site Directed Mutagenesis (Agilent) and mutagenic primer pairs for:

635 Q133H: 5'-CGCTTTCCATCACCATGTGCATGATGA-3' and

636 5'-GATCGTCATCATGCACATGGTGATGGA-3'

637 P183H: 5'-CCTGTCCTATTATCATACTTCCTCCTC-3' and

638 5'-GTGGAGGAGGAAGTATGATAATAGGA-3'.

639 The  $\Delta$ 95-99 emerin deletion was produced using partially phosphorothioated PCR primers and  
640 T7 exonuclease digestion, as previously described(Stoynova et al., 2004). Primers pairs for the  
641  $\Delta$ 95-99 deletion were:

642 5'-GACTACTTCACCA\*C\*C\*A\*GGACTTAT-3' and

643 5'-GGTGAAGTAGTCG\*T\*C\*A\*TTGTAGCC-3',

644 where \* denotes phosphorothioate modifications. All primers were obtained from Integrated  
645 DNA Technologies (IDT) and all mutations were verified by sequencing.

646 siRNA duplex for BAF, SUN1 and Dicer siRNA for lamin A/C, SUN1 and controls were  
647 obtained from IDT. The sequences of sense nucleotides were as follows:

- 648 - BAF siRNA: 5'-AGAUUGCUAUUGUCGUACUUU-3'
- 649 - Lamin A/C DsiRNA #1: 5'-AGCUGAAAGCGCGCAAUACCAAGaa-3',
- 650 - Lamin A/C DsiRNA #2: 5'-GGAACUGGACUCCAGAAGAACAAtc-3',
- 651 - SUN1 DsiRNA #1 5'-GCUUUUAGUAUCAACCACGUGUCaa-3'.
- 652 - SUN1 siRNA #2: 5'-CCAUCCUGAGUAUACCUGUCUGUAU-3'.
- 653 - Control DsiRNA: 5'-CGUUAUUCGCGUAUAAUACGCGUat-3' (IDT#51-01-14-  
654 04).

655 siRNA duplex for IPO9 was obtained from Ambion (id# S31299) and siRNA for the nuclear  
656 actin exporter XPO6 was obtained from Qiagen (id# SI00764099). All siRNA were transfected  
657 or co-transfected with emerin plasmids at 25 nM using X-tremeGENE HP (Roche). When  
658 associated with lentiviral expression of emerin, siRNA transfection was done 2 hours before viral  
659 titer application.

660 Exogenous BAF<sup>L58R</sup> was expressed from an EGFP-BAF<sup>L58R</sup> lentiviral plasmid(Samwer et al.,  
661 2017) and lentiviral particles were produced by the UCLA Vector Core. HDF cells were  
662 transduced with 25 ng ml<sup>-1</sup> of lentiviral particles as described for SNAP-emerin. For rescue of  
663 lamin A/C expression and overexpression experiments, cDNA encoding for an exogenous  
664 siRNA-resistant human lamin A/C (Frock et al., 2006) was kindly provided by Dr. Richard  
665 Frock, Stanford University, USA and used together with lamin A/C DsiRNA #2, designed to  
666 knockdown endogenous lamin A/C. For rescue of SUN1 expression and overexpression  
667 experiments, cDNA encoding for an exogenous siRNA-resistant human SUN1 fusion to EGFP  
668 (EGFP-SUN1) was kindly provided by Dr. Christine Doucet, Centre de Biochimie Structurale,  
669 Montpellier, France and used together SUN1 siRNA #2, designed to knockdown endogenous  
670 SUN1, as previously described(Talamas and Hetzer, 2011). Exogenous expression of mcherry-  
671 DN-KASH was achieved by cell transfection of the mammalian expression plasmid #125553,  
672 obtained from Addgene.

673

#### 674 **Cell micropatterning and nuclear shape index measurements**

675 HDF were micropatterned as described previously(Bautista et al., 2019; Fernandez et al., 2017).  
676 Briefly, hexamethyldisilazane-activated glass coverslips (Marienfeld, #1.5, Ø25 mm) were

677 stamped with rectangular and fibronectin-coated polydimethylsiloxane stamps having lengths of  
678 210  $\mu\text{m}$  and widths of 15  $\mu\text{m}$ , 10  $\mu\text{m}$ , or 5  $\mu\text{m}$  respectively. Cell attachment outside the  
679 fibronectin strips was blocked with a 1% solution of Pluronic F-127. After attachment for 1 hour  
680 and removal of unattached cells, HDF were allowed to spread out on the micropatterns for 6  
681 hours at 37°C before being prepared for microscopy imaging.

682 Using ImageJ(Schneider et al., 2012), the nuclear shape index (NSI) was determined by  
683 measuring the nuclear cross-sectional area and the nuclear perimeter of DAPI-stained nuclei  
684 imaged by wide-field microscopy, and by calculating the ratio:

$$685 \quad \text{NSI} = \frac{4 \times \pi \times \text{area}}{\text{perimeter}^2} \quad (1)$$

686 The NSI measures the roundness of the nucleus, with an NSI of 1 corresponding to a circular  
687 nuclear shape. Mean NSI values  $\pm$  standard deviation of the mean were reported for multiple cell  
688 nuclei per condition. In graphs, the box length indicates the NSI interquartile range, the central  
689 square indicates the NSI mean, the central bar indicates the NSI median and the error bars  
690 indicate the standard deviation. The number of measured nuclei was n=54, 70, 61 and 62 nuclei  
691 for *EMD*<sup>+/-</sup> cells in non-patterned, 15, 10 and 5  $\mu\text{m}$  wide patterns, respectively; n=75, 60, 70 and  
692 66 nuclei for lamin A/C depleted cells; and n=62, 71, 66 and 46 nuclei for nuclear actin depleted  
693 cells. For *EMD*<sup>-/-</sup> cell expressing wild-type emerin, the number of measured nuclei was n=38,  
694 33, 26 and 57 nuclei in non-patterned, 15, 10 and 5  $\mu\text{m}$  wide patterns, respectively; n= 74, 58 and  
695 37 nuclei for Q133H emerin; n= 64, 89, 45 and 46 nuclei for  $\Delta$ 95-99 emerin and n=82, 78 and 28  
696 nuclei for P183H emerin. Significant differences between NSI values were evaluated using a  
697 Wilcoxon rank-sum test.

698

### 699 **Microscopy imaging**

700 Confocal imaging of immunostained emerin in normal HDF, emerin-null HDF and emerin null  
701 HDF after expression of wild-type PA-TagRFP-emerin were performed on an Olympus  
702 Fluoview FV1000 confocal microscope equipped with a 60x/1.40 NA objective, 405 nm and 488  
703 nm lasers and appropriate emission filters for imaging DAPI (450/20 nm) and Alexa-488 labeled  
704 antibodies against emerin (510/10 nm).

705 Confocal imaging of nuclear deformation and actin organization in micropatterned *EMD*<sup>+/-</sup> HDF  
706 was performed on a Zeiss LSM 700 microscope equipped with a C-Apochromat 63x/1.15 W

707 Korr objective, excitation lasers at 405 nm and 488 nm and appropriate beamsplitter and  
708 emission channel settings for dual detection of DAPI and phalloidin-iFluor 488.

709 Wide-field imaging of labeled actin and labeled nuclei for NSI measurements were performed on  
710 an inverted Nikon Eclipse Ti-E microscope equipped with a 40x objective (Nikon), an iXon  
711 Ultra EMCCD camera (Andor), 405 nm and 488 nm lasers, a T495lpxr dichroic mirror and a  
712 525/50 emission filter (Chroma) for phalloidin-iFluor 488 or a 458Di02 dichroic mirror and a  
713 483/32 emission filter (Semrock) for DAPI.

714 SptPALM, dSTORM and CALM imaging were performed on an inverted Nikon Eclipse Ti-E  
715 microscope equipped with a 100x 1.49 NA objective (Nikon), an iXon EMCCD camera (Andor),  
716 perfect focus drift compensation optics, an astigmatic lens for 3D super-resolution imaging, a  
717 piezo z-scanner for calibration of 3D super-resolution images (Mad City Labs), laser lines at 405,  
718 488, 561 and 647 nm (Agilent), a multiband pass ZET405/488/561/647x excitation filter  
719 (Chroma), a quad-band ZT405/488/561/647 dichroic mirror (Chroma) and appropriate emission  
720 filters for sptPALM imaging of PA-tagRFP (600/50 nm, Chroma), 3D-dSTORM imaging of  
721 Alexa-647 (700/75 nm, Chroma) and CALM imaging of complemented split-GFP (525/50 nm,  
722 Semrock).

723 sptPALM of PA-TagRFP-emerin was performed in 37°C HBSS buffer (Corning) by highly  
724 inclined and laminated optical sheet (HILO) excitation of the bottom nuclear membrane of cells  
725 with a continuous and low power photoactivation at 405 nm and an excitation at 561 nm. The  
726 HILO illumination angle was  $\theta = 51.6^\circ$ . Images were acquired continuously at a frame rate of 40  
727 ms per frame for no longer than 3 minutes per cell to limit UV damage. CALM imaging of  
728 complemented emerin-GFP-emerin species was done as described for sptPALM but with a single  
729 HILO excitation at 488 nm.

730 dSTORM of SNAP-emerin labeled with BG-A647 was performed at room temperature in a  
731 photoswitching buffer composed of 10% glucose, 0.5 mg ml<sup>-1</sup> glucose oxidase (Sigma), 40 µg  
732 ml<sup>-1</sup> catalase (Sigma), and 1% β-mercaptoethanol (Sigma). Continuous photoswitching was  
733 achieved with a low power 488 nm laser and imaging was done with a 647 nm laser excitation at  
734 a frame rate of 80 ms per frame. Z-calibration and sample drift corrections were done using a  
735 few 40 nm TransFluoSphere beads (488/685 nm, Life Technologies) as fiducial markers spread  
736 on the cell samples.

737 For rescue and overexpression experiments, dSTORM imaging of SNAP-emerin was performed  
738 only in cells expressing exogenous human lamin A/C, human EGFP-SUN1 or mcherry-DN-  
739 KASH, as identified by lamin A/C immunostaining, EGFP or mCherry fluorescence. In the case  
740 of lamin A/C and EGFP-SUN1 rescues, imaging was done in cells having relatively low  
741 exogenous expressions.

742

743 **Fluorescence recovery after photobleaching (FRAP) of emerin:** FRAP of wild-type emerin  
744 and emerin mutants was done in U2OS cells transiently transfected with PA-TagRFP-emerin.  
745 Cells were imaged at 37°C in HBSS buffer (Corning) on an Olympus Fluoview FV1000 confocal  
746 microscope equipped with a 60x/1.40 NA oil immersion objective. PA-TagRFP-emerin at the  
747 bottom NE was briefly photoactivated by laser scanning at 405 nm and PA-TagRFP fluorescence  
748 was monitored every 2.8 seconds with a 543 nm laser. Circular regions of interest (7  $\mu\text{m}$  in  
749 diameter) were photobleached and recorded. After background subtraction, FRAP curves were  
750 doubly normalized as previously described(Phair et al., 2004) to correct for loss of fluorescence  
751 due to bleaching during acquisition. FRAP curves from measurements on 9-12 cells per  
752 condition were averaged after normalization to full scale. After comparison of one- or two-  
753 component lateral diffusion models(Soumpasis, 1983), the apparent diffusion coefficients of  
754 emerin were determined by fitting FRAP curves with a two-component model using equations  
755 for a uniform circular bleach region(Soumpasis, 1983). A fast ( $D_{\text{fast}} = 4.48 \times 10^{-2} \pm 1.0 \times 10^{-2}$   
756  $\mu\text{m}^2/\text{s}$ , 17%) and slow ( $D_{\text{slow}} = 4.0 \times 10^{-3} \pm 4 \times 10^{-4}$   $\mu\text{m}^2/\text{s}$ , 83%) diffusive behaviors of wild-type  
757 emerin is observed by FRAP (Fig. S1), consistent with previously diffusion values ( $1.0 \times 10^{-1} \pm$   
758  $1 \times 10^{-2}$   $\mu\text{m}^2/\text{s}$  and  $7.50 \times 10^{-2} \pm 2.9 \times 10^{-3}$   $\mu\text{m}^2/\text{s}$ )(Haraguchi et al., 2008; Ostlund et al., 1999;  
759 Ostlund et al., 2006) and the reported presence of a nearly immobile emerin fraction at the  
760 NE(Haraguchi et al., 2008; Shimi et al., 2004). Emerin mutations P183H, Q133H, and  $\Delta 95-99$  do  
761 not display statistically significant differences in ensemble diffusion dynamics compared to wild-  
762 type emerin (Fig. S1).

763

764 **Cell extracts and immunoblotting:** After siRNA treatment, cells were harvested and  
765 fractionated as described previously(Berk et al., 2013a). Cells were scraped, centrifuged for 5  
766 min at 4000 g and washed three times with PBS. Cell pellets were then flash frozen and stored at  
767 -80°C. Cells were thawed for 10 minutes on ice, and then for 10 min in 300  $\mu\text{l}$  ice cold hypotonic

768 lysis buffer (20 mM HEPES, pH 7.4, 50 mM N-acetylglucosamine, 1 mM DTT, 100  $\mu$ M PMSF,  
769 1  $\mu$ g/ml pepstatin A, 1x protease inhibitor (Roche) and 1x PhosSTOP phosphatase inhibitor  
770 (Roche) before being resuspended and set on ice for another 10 min. Cells were then spun down  
771 at 17,000 g for 1 min to collect the supernatant cytoplasmic fraction. The pellet was then washed  
772 three times in PBS with spinning at 17,000 g for 1 min in between washes to remove any  
773 residual cytoplasmic components. The pellet was then resuspended in nuclear lysis buffer (50  
774 mM Tris-HCL, pH 7.4, 300 mM NaCl, 0.3% Triton X-100, 50 mM N-acetylglucosamine, 1 mM  
775 DTT, 100  $\mu$ M PMSF, 1  $\mu$ g/ml pepstatin A, 1x protease inhibitor (Roche) and 1x PhosSTOP  
776 phosphatase inhibitor (Roche) before vortexing to release nuclear contents. Nuclear fractions  
777 were additionally sonicated 20 times in 0.5 s bursts to liberate dense nuclear aggregates.  
778 Cytoplasmic and nuclear fractions were analyzed by SDS-PAGE. Protein concentrations were  
779 determined using a Bradord assay, and equal amounts of protein were loaded on gels before  
780 running in a Laemmli Buffer. Proteins were transferred to a nitrocellulose membrane (Bio-Rad)  
781 by wet transfer at 4°C. The membrane was then rinsed with Tris-buffered saline (TBS, pH 7.5)  
782 and blocked with 5% milk in TBS for 1 hour. Membranes were probed with the following  
783 primary antibodies: mouse anti-lamin A/C (1:1000, Santa Cruz Biotechnology, sc-7292), mouse  
784 anti-actin (1:1000, Santa Cruz Biotechnology, sc-8432), mouse anti-BAF (1:1000, Santa Cruz  
785 Biotechnology, sc-166324), rabbit anti-SUN1 (1:2000; HPA008346, Sigma-Aldrich), mouse  
786 anti-histone H2A (1:1000, Santa Cruz Biotechnology, sc-515808) and mouse anti-GAPDH  
787 (1:1000, GeneTex, GTX627408). A goat anti-mouse IgG (H+L) HRP conjugate (1:3000,  
788 Invitrogen, 62-6520) and a goat anti-rabbit IgG (H+L) HRP conjugate (1:5000, Invitrogen, 65-  
789 6120) were used as secondary antibodies. Blots were developed with SuperSignal West Femto  
790 Maximum Sensitivity Substrate (Thermo) and imaged on a Chemidoc XRS+ (BioRad). All  
791 assays were performed in triplicate and immunoblot quantification was done with ImageJ, using  
792 t-tests for statical comparisons with wild-type (Fig. S2).

793

#### 794 **Immunostaining and fluorescence imaging of RNAi effects and exogenous protein**

795 **expressions:** *EMD*<sup>+y</sup> HDF were transfected with control siRNAs, or siRNAs against lamin A/C,  
796 IPO9, BAF, and SUN1, respectively as described in Materials and Methods. Cell were fixed with  
797 4% PFA in 1x PBS for 15 min, permeabilized with 0.1% Triton X-100 for 10 min, and blocked  
798 with 4% BSA + 0.1% Tween-20 for 1h, all at RT. For lamin A/C and SUN1 immuno-staining,



799 cells were incubated with mouse anti-lamin A/C (1:400; sc-7292, Santa Cruz Biotechnology) and  
800 rabbit anti-SUN1 (1:500; HPA008346, Sigma-Aldrich) for 1hr at RT, rinsed 3x with 1x PBS for  
801 5 minutes each, then stained with goat anti-mouse-Alexa Fluor 647 (1:500, Life Technologies)  
802 and goat anti-rabbit-Alexa Fluor 488 (1:500, Life Technologies) for 1hr at RT. Following 3x  
803 PBS rinse, the coverslips were mounted in DAPI-Fluoromount G (Electron Microscopy  
804 Sciences) and imaged. For BAF staining, cells were incubated with mouse anti-BAF (1:100; sc-  
805 166324, Santa Cruz Biotechnology) for 2hr at RT, then with goat anti-mouse-Alexa Fluor 647  
806 (1:500) for further 2hr. To assess the effect of BAF L58R re-expression on lamin A/C  
807 organization, 24 hours after siRNA treatment against BAF, cells were transduced with the  
808 lentivirus for EGFP-BAF L58R expression and fixed two days later, before staining for lamin  
809 A/C as described above. To assess the influence of lamin A/C or EGFP-SUN1 expression on the  
810 localization of endogenous emerin, *EMD*<sup>+y</sup> HDF were fixed and immunostained with rabbit anti-  
811 emerin (Abcam) and mouse anti-lamin A/C (Santa Cruz Biotechnology) antibodies as described  
812 above. Confocal fluorescence imaging (Fig. S2 and S6) was performed on a Zeiss LSM 780  
813 microscope equipped with a C-Apochromat 63×/1.15 W Korr objective, excitation lasers at 405  
814 nm, 488 nm and 633 nm, and appropriate beam splitter and emission channel settings for  
815 detection of DAPI, GFP, Alexa Fluor-488 and Alexa Fluor-647 labeled secondary antibodies.  
816 Other than effective and specific knockdown of targeted protein expressions, there was no  
817 obvious indirect or off-target effects of the different siRNA treatments on the organization other  
818 studied proteins (Fig. S2).

819 To assess the influence of IPO9 and XPO6 siRNA on nuclear actin organization and content,  
820 Utr230-EGFP-3xNLS (Utr230-EN, Addgene #58466) was subcloned into a pHR-SFFV lentiviral  
821 plasmid backbone, viral particles were generated, and *EMD*<sup>+y</sup> HDF cells were transduced with  
822 25 ng ml<sup>-1</sup> of lentiviral particles as described for SNAP-emerin. 10 µg/mL blasticidin S  
823 (Invivogen) was used over 12 days to establish a stable cell line expressing Utr230-EN. Cells  
824 were then transfected with 25 nM of control, IPO9 or XPO6 siRNAs, as described above, before  
825 being fixed with 4% PFA for 15 minutes, rinsed 3x with 1xPBS, and mounted using  
826 Fluoromount-G (Electron Microscopy Sciences). Confocal fluorescence imaging was performed  
827 on a Zeiss LSM 780 upright microscope equipped with a Plan-Apochromat 40×/1.4 Oil  
828 objective, excitation laser at 488 nm, and appropriate beam splitter and emission channel settings  
829 for the detection of EGFP. From confocal images, cells were classified into three groups

830 depending on the nuclear localization pattern of Utr230-EN: (i) small puncta and diffuse, (ii)  
831 diffuse or (iii) large foci, based on a similar previous classification(Belin et al., 2013). Data were  
832 pooled from three independent assays for each condition.

833  
834 **Quantification of ONM emerin fraction.** The fraction of ONM emerin in  $EMD^{+/y}$  HDF was  
835 quantified after saponin (ONM+ER emerin) or Triton X-100 (INM+ONM+ER emerin)  
836 permeabilization and immunostaining with rabbit anti-emerin (1  $\mu\text{g/mL}$ , ab40688, Abcam) and  
837 mouse anti-lamin A/C (1:1000, sc-7292, Santa Cruz Biotechnology) antibodies, as previously  
838 described(Bautista et al., 2019). Whole cell volumes were imaged by 3D confocal microscopy  
839 and all the z-slices were combined into a single image by sum intensity z-slices projection.  
840 Regions of interest were delineated to quantify emerin fluorescence intensities over the entire  
841 cells (ROI1) or over the nucleus (ROI2) after background corrections. Nuclear ROI2 were  
842 further corrected for ER emerin contributions by evaluating the mean ER-only emerin intensity  
843 per area from ROI1-ROI2 intensities. Using a representative set of 20 cells for both saponin and  
844 Triton X-100 treatments, the fraction of ONM emerin per cell was then calculated using:

$$845 \quad \text{ONM fraction} = \text{ER}_{\text{corrected}} \text{ROI2}_{\text{saponin(ONM)}} / \text{ER}_{\text{corrected}} \text{ROI2}_{\text{Triton X-100(INM+ONM)}}$$

846 The mean ONM fraction of emerin at the NE was  $13 \pm 6$  %, in good agreement with the levels of  
847 ONM emerin detected in sptPALM experiments (Fig. S4).

848

### 849 **Analyses of diffusion coefficients**

850 Localization and tracking analyses were performed using the software package SLIMfast, which  
851 uses multiple-target tracing algorithms(Serge et al., 2008) and was kindly provided by Christian  
852 Ritcher and Jacob Piehler. Localizations were performed by 2D-gaussian fitting of the point-  
853 spread-function of each activated PA-TagRFP-emerin or activated emerin-GFP-emerin species  
854 in each frame. Localization precision was determined as previously described(Mortensen et al.,  
855 2010; Thompson et al., 2002), and individual PA-TagRFP-emerin were localized with a  
856 precision of  $13 \pm 5$  nm. Diffusion trajectories were built by linking localizations frame to frame  
857 and accounting for blinking statistics and local particle densities. Trajectories with fewer than  
858 three steps were discarded. Diffusion coefficients were estimated using a probability density of  
859 square displacement (PDS) analysis(Schutz et al., 1997). For each time lag  $t$ , the PDS curve  
860 was fitted with the following model:

861

$$862 \quad P(\vec{r}^2, t) = 1 - \sum_{i=1}^n a_i(t) e^{-r^2/r_i^2(t)} \quad (2)$$

$$863 \quad \sum_{i=1}^n a_i(t) = 1$$

864

865 where  $r_i^2(t)$  is the square displacement and  $a_i(t)$  is the population density of  $i$  numbers of  
866 diffusive behaviors at each time lag  $t$ . To limit the risks of overfitting or underfitting the PDS  
867 curves and select an appropriate model for  $i$  numbers of diffusive behaviors in each data set, we  
868 used both an Akaike information criterion (AIC) and a Bayesian information criterion (BIC)  
869 after fitting PDS with models where  $1 \leq i \leq 5$ . Square displacement curves ( $r_i^2(t)$ ) were extracted  
870 from PDS analyses and reported with error bars determined using  $\frac{r_i^2}{\sqrt{N}}$ , where  $N$  is the number of  
871 analyzed trajectories per time lag, as previously described (Schutz et al., 1997). Diffusion  
872 coefficients ( $D$ ) representative of each behavior were determined by fitting each  $r_i^2(t)$  curves  
873 over the first four time lags ( $t_1-t_4$ ) using OriginPro 2020 software (OriginLab) and a 2D  
874 Brownian diffusion model with position error:

$$875 \quad r^2 = 4Dt + 4\sigma^2 \quad (3)$$

876 The numbers of trajectories and nuclei analyzed were: wild-type emerin (71004 trajectories, 14  
877 nuclei); lamin A/C depletion (lamin A/C KD, 60569 trajectories, 11 nuclei); nuclear actin  
878 depletion (IPO9 KD, 74501 trajectories, 17 nuclei); replacement of endogenous BAF with  
879 BAF<sup>L58R</sup> (BAF KD + BAF<sup>L58R</sup>, 62714 trajectories, 8 nuclei); complemented wild-type emerin-  
880 GFP-emerin species assessed by CALM (4833 trajectories, 13 nuclei); wild-type emerin after  
881 nuclear deformation on 15  $\mu\text{m}$  (27266 trajectories, 10 nuclei); wild-type emerin after nuclear  
882 deformation on 10  $\mu\text{m}$  wide micropatterns (12915 trajectories, 8 nuclei); Q133H emerin (105050  
883 trajectories, 13 nuclei);  $\Delta 95-99$  emerin (76944 trajectories, 14 nuclei); P183H emerin (86529  
884 trajectories, 21 nuclei); and complemented P183H emerin-GFP-emerin species assessed by  
885 CALM (10519 trajectories, 21 nuclei). All diffusion coefficients  $D$  are reported in  $\mu\text{m}^2 \text{ s}^{-1} \pm$   
886 standard error of fit value ( $\pm$ s.e.m.). Statistical comparisons between  $D$  values were done using  $t$ -  
887 tests. Population percentages are derived from the averaged  $a_i(t)$  values over the considered time  
888 lags.

889 To estimate the diffusion that might be expected for immobile PA-TagRFP-emerin ( $D_{\text{immobile}}$ )  
890 under our imaging and analytical conditions, we simulated immobilized PA-TagRFP emerin with

891 photophysical parameters similar to that of live cell acquisitions, using the software  
892 Fluosim(Lagardère et al., 2020). After PSD analysis with SLIMfast,  $D_{\text{immobile}}$  was determined at  
893  $1.7 \times 10^{-4} \pm 2 \times 10^{-5} \mu\text{m}^2 \text{s}^{-1}$ .

894 Individual diffusion coefficients ( $D_i$ ) were obtained by fitting the individual mean square  
895 displacement (MSD) for each detected emerin over the first three time lags ( $t_1-t_3$ ), using again a  
896 2D Brownian diffusion model. Based on their individual  $D_i$  value, emerin trajectories were  
897 grouped into four diffusion ranges ( $D_{i1} > 0.1 \mu\text{m}^2 \text{s}^{-1}$ ,  $0.1 < D_{i2} < 0.01 \mu\text{m}^2 \text{s}^{-1}$ ,  $0.1 < D_{i3} < 0.001 \mu\text{m}^2$   
898  $\text{s}^{-1}$ , and  $D_{i4} < 0.001 \mu\text{m}^2 \text{s}^{-1}$ ) and plotted as maps.

899

### 900 **Spatial distribution and cluster analyses from super-resolution images**

901 After 3D-dSTORM super-resolution imaging, the localization of individual emerin molecules  
902 and z-position assignments were performed by Gaussian fitting using rapidSTORM (version  
903 3.3.1)(Wolter et al., 2012). Sample drift and overcounting corrections for molecules appearing in  
904 consecutive frames were done using PALMsiever(Pengo et al., 2015) and renderings of super-  
905 resolved images were done using ImageJ. Localization precisions ( $\sigma$ ) in the x, y, and z  
906 dimensions were evaluated as previously described(Fernandez et al., 2017) and were  $\sigma_x$ :8.3 nm,  
907  $\sigma_y$ :13.0 nm, and  $\sigma_z$ :28.4 nm. 2D spatial pattern analyses of emerin distributions were performed  
908 on  $2 \mu\text{m} \times 2 \mu\text{m}$  regions of interest (ROI) typically chosen in NE areas having homogenous z  
909 ranges and away from the edges of nuclei, in order to limit 3D effects.

910 Emerin clustering was determined using an edge-corrected neighborhood density function (NDF)  
911 as previously described(Fernandez et al., 2017). Briefly, the NDF is a pairwise-correlation  
912 function similar to O-ring statistics that tallies the density of detected emerin within a ring of  
913 outer radius  $r$  and width  $\Delta r$  located at a distance  $r$  from an emerin position in the ROI and for all  
914  $r + \Delta r$  in the ROI. The density of emerin as a function of distance from an average emerin was  
915 obtained with:

$$916 \quad D_r = \frac{\sum N_r}{\sum A_r} \quad (4)$$

917 where  $N_r$  is the number of neighbors and  $A_r$  is the area summed over all detected emerin. NDF  
918 analyses were done over a  $1 \mu\text{m}$  distance on selected ROIs and with a fixed ring width of 10 nm  
919 and a ring radius increasing by 10 nm steps. To average NDF statistics from multiple ROIs  
920 across different nuclei and make them sample-size independent,  $D_r$  was further standardized by  
921 dividing it by the mean density of detected emerin across the entire ROI. As such, an NDF value

922 at a given radius indicates the relative clustering of emerin as compared to the average density  
923 across the entire sample. This relative NDF gives a value of 1 for a completely random spatial  
924 distribution as determined by Monte Carlo simulations of random emerin distributions with area  
925 and number of randomly seeded emerin equal to that of each experimental ROIs.

926 Relative NDF curves averaged across multiple ROIs and multiple nuclei were fitted with a  
927 previously described model(Fernandez et al., 2017), which accounts for a distribution of cluster  
928 lengths that includes two populations of emerin (monomer and oligomers) and for a probability  
929 density of emerin in 2D clusters that decays approximately as an exponential function(Sengupta  
930 et al., 2011):

$$931 \quad \text{Relative NDF} = \{A_1 \times \exp\left(\frac{-r}{\varepsilon_1}\right) + A_2 \times \exp\left(\frac{-r}{\varepsilon_2}\right) + 1\} * g(r)^{PSF} \quad (5)$$

932 where,  $A$  is the clustering density,  $\varepsilon$  is the typical half-maximum cluster length,  $*$  denotes a 2D  
933 convolution, and  $g(r)^{PSF}$  is the correlation function of the effective point spread function of  
934 uncertainty in position determination for the dSTORM experiments. As described  
935 previously(Fernandez et al., 2017),  $g(r)^{PSF}$  corrects the NDF for contribution of multiple single  
936 molecule appearances (blinking) to the overall spatial distribution. After fitting relative NDF  
937 curves, the molecular density above random for emerin clusters are reported as  $A \pm$  standard  
938 error of the fit ( $\pm$ s.e.m) and their typical size as  $2 \times \varepsilon \pm$  standard error of the fit and localization  
939 precision ( $\pm$ s.e.m). Relative increases in emerin oligomer formation during nuclear stress were  
940 determined by considering a circular shape of oligomer nanodomains and multiplying the area of  
941 oligomerization by the measured molecular density.

942 The numbers of localization and nuclei analyzed were: wild-type emerin in untreated cells  
943 (189331 localizations, 10 nuclei); after control siRNA transfection (n= 180546 localizations, 5  
944 nuclei); after lamin A/C knockdown (178206 localizations, 6 nuclei); after lamin A/C  
945 knockdown and exogenous expression of lamin A/C (118859 localizations, 6 nuclei); after IPO9  
946 knockdown (225394 localizations, 9 nuclei); after replacement of endogenous BAF by BAF<sup>L58R</sup>  
947 (90,241 localizations, 6 nuclei); after SUN1 knockdown (258300 localizations, 6 nuclei); after  
948 SUN1 knockdown and exogenous expression of EGFP-SUN1 (85210 localizations, 5 nuclei);  
949 after exogenous expression of mCherry-DN-KASH (392365 localizations, 5 nuclei); after  
950 nuclear deformation on 15  $\mu$ m wide micropatterns (151647 localizations, 10 nuclei); after  
951 nuclear deformation on 10  $\mu$ m wide micropatterns (56563 localizations, 6 nuclei); for Q133H  
952 emerin (149340 localizations, 6 nuclei); for  $\Delta$ 95-99 emerin (208092 localizations, 8 nuclei); for

953 P183H emerin (138075 localizations, 6 nuclei); for  $\Delta 95-99$  emerin after nuclear deformation on  
954 15  $\mu\text{m}$  wide micropatterns (138119 localizations, 5 nuclei); and for  $\Delta 95-99$  emerin after nuclear  
955 deformation on 10  $\mu\text{m}$  wide micropatterns (135143 localizations, 6 nuclei).

956

### 957 **Cluster maps**

958 Cluster maps were generated from drift- and overcounting-corrected super-resolved emerin  
959 positions by determining local cluster values around each emerin using the Getis and Franklin L  
960 function (Getis and Franklin, 1987) in spPack (Perry, 2004) and for a distance of 25 nm. Spatial  
961 positions in x and y, and cluster values were plotted as maps in MATLAB (MathWorks) using  
962 the meshgrid and griddata functions, a 1 nm x 1 nm pixel size and the 'v4' option when  
963 calculating pixel density values. The contour maps were generated using the countourf function  
964 with 200 levels. In contour maps, values  $L(r_{25})=25$  represent areas where emerin is randomly  
965 distributed and  $L(r_{25})=70$  values represent areas with emerin local density  $(70/25)^2 = \sim 8$ -fold  
966 higher than expected for a random distribution.

967

968

969

970

### 971 **Acknowledgements**

972 This work was supported by the National Institute of Arthritis and Musculoskeletal and Skin  
973 Diseases of the National Institutes of Health under award number R21AR076514. We are  
974 grateful to H. Worman for providing emerin null and normal HDF and to J. Ellis, R. Frock and  
975 C. Doucet for providing emerin, lamin A/C and EGFP-SUN1 cDNAs, respectively.

976

### 977 **Competing financial interests**

978 The authors declare no competing financial interests.

979

980

981

982

983

984

985

986

987

988

989



990  
991  
992  
993  
994  
995  
996  
997  
998  
999  
1000  
1001  
1002  
1003  
1004  
1005  
1006  
1007  
1008  
1009  
1010  
1011  
1012  
1013

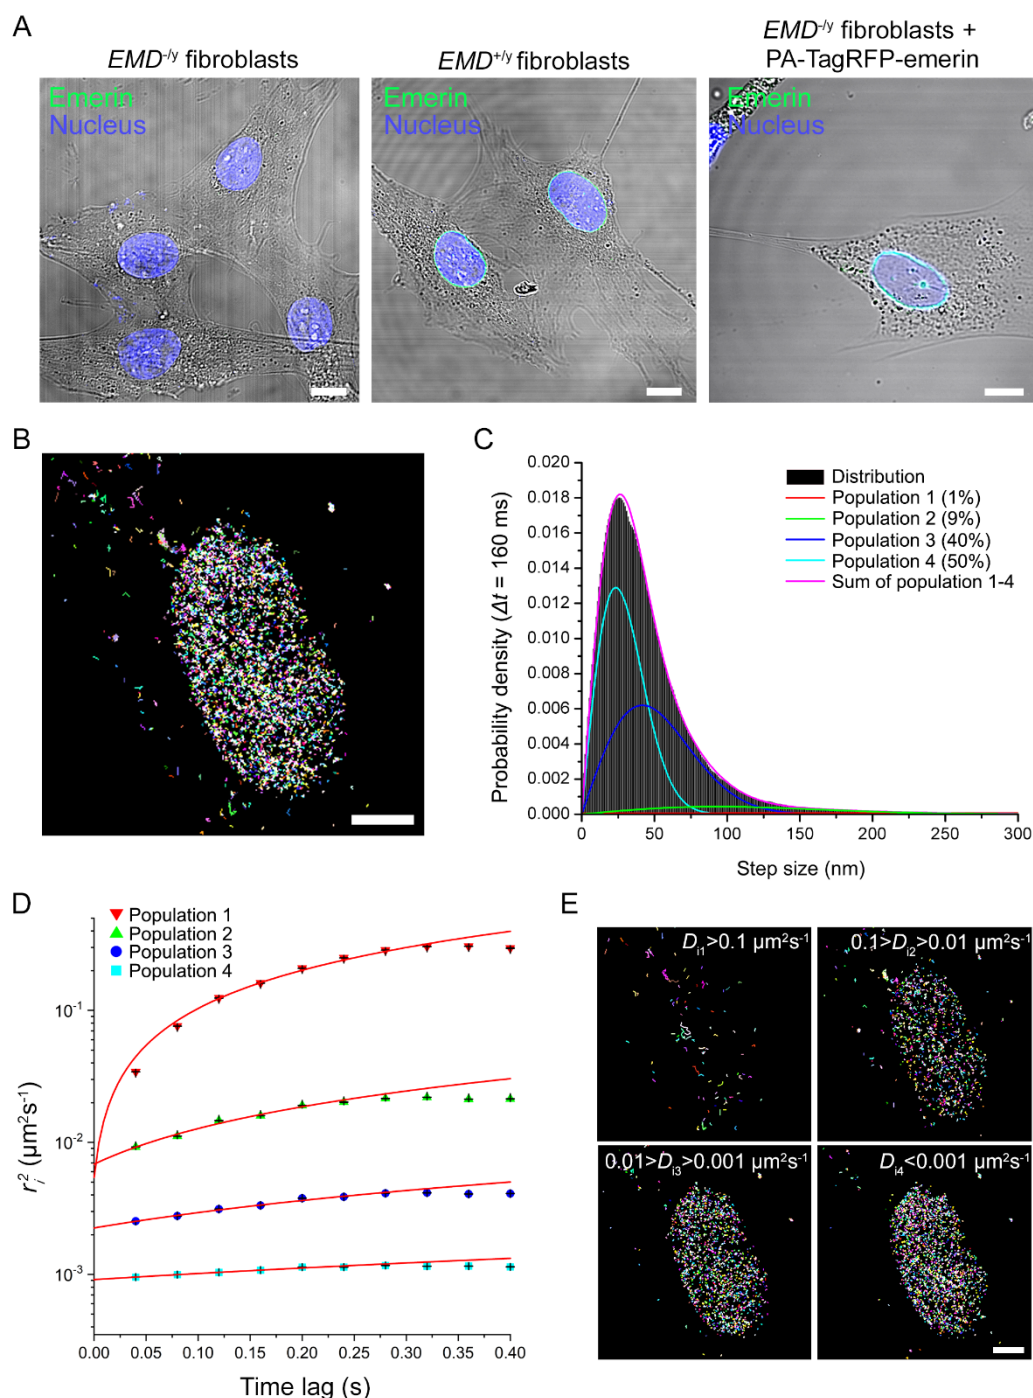

1014  
 1015 **Fig. 1. Emerin displays distinct diffusive behaviors at the nuclear envelope.** (A) Confocal  
 1016 imaging of emerin in *EMD*<sup>-/-</sup> HDF, *EMD*<sup>+/-</sup> HDF and *EMD*<sup>-/-</sup> HDF expressing wild-type PA-  
 1017 TagRFP-emerin. Scales: 10  $\mu\text{m}$ . (B) Trajectory map of individual PA-TagRFP-emerin at the NE.  
 1018 Scale: 5  $\mu\text{m}$ . (C) Probability distribution of square displacements for wild-type emerin at time  
 1019 lag  $\Delta t = 160$  ms. (D) Square displacement curves ( $r_i^2$ ) of each emerin diffusive behavior fitted  
 1020 over the first four values with a Brownian diffusion model (red line). (E) Emerin trajectory maps  
 1021 as a function of individual diffusion coefficient ( $D_i$ ). Scale: 5  $\mu\text{m}$ .  
 1022

1023  
1024  
1025

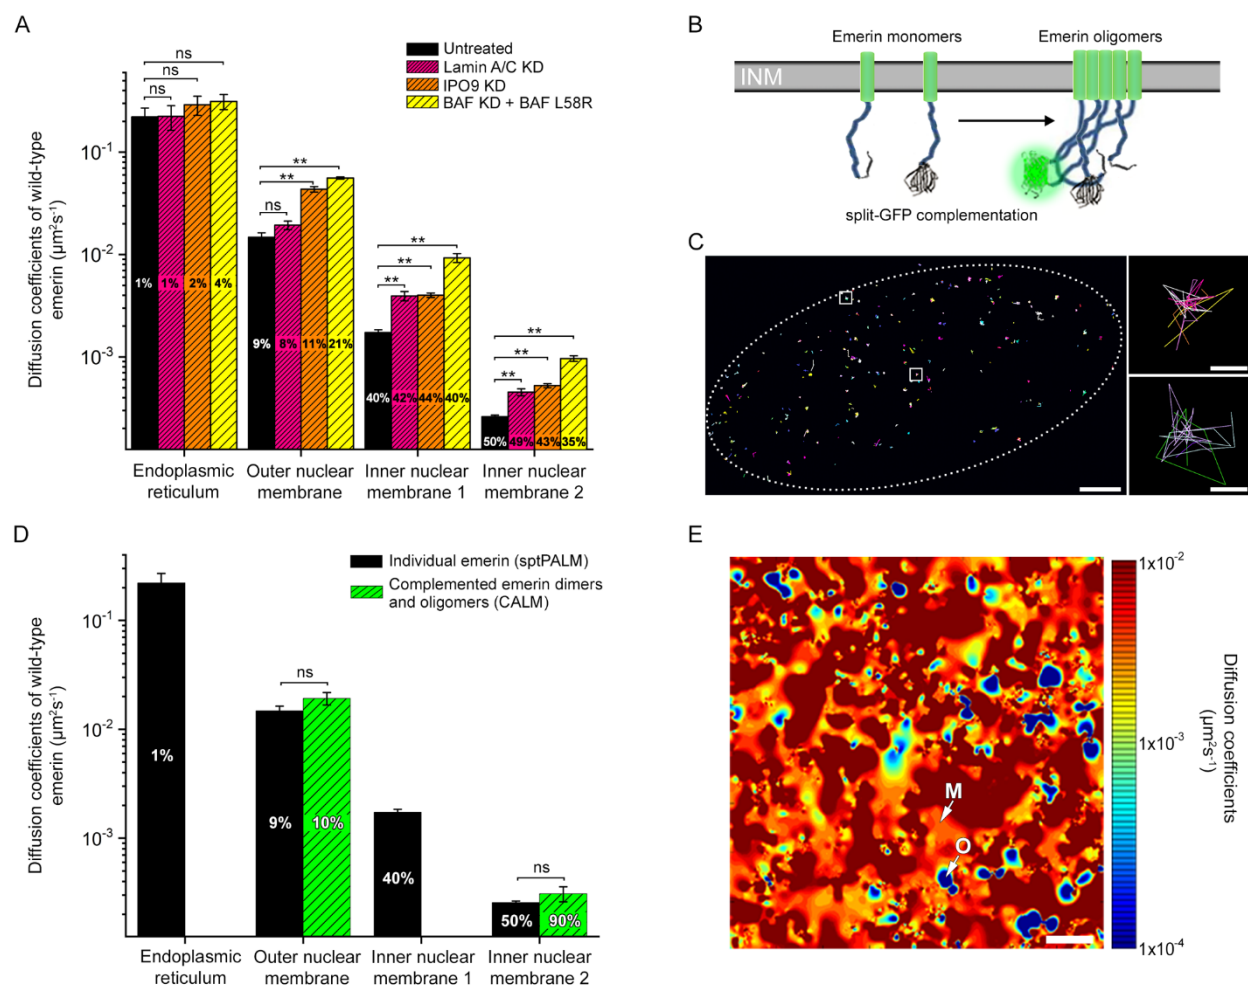

1026  
1027 **Fig. 2. Emerin diffuses as monomers and oligomers interacting with lamin A/C, nuclear**  
1028 **actin and BAF.** (A) Diffusion coefficients ( $\pm$ s.e.m.) and percentages of wild-type emerin after  
1029 lamin A/C depletion, nuclear actin depletion (IPO9 KD) or replacement of endogenous BAF  
1030 with BAF<sup>L58R</sup>. (B) Schematic of emerin fusion to complementary split-GFP fragments. (C)  
1031 Trajectory map of complemented emerin-GFP-emerin at the NE. Squares: oligomeric  
1032 nanodomains with overlapping trajectories. Scales: 2  $\mu\text{m}$  (left) and 50 nm (right). (D) Diffusion  
1033 coefficients ( $\pm$ s.e.m.) and percentages for wild-type emerin assessed by sptPALM and  
1034 complemented emerin-GFP-emerin species assessed by CALM. (E) Diffusion map of wild-type  
1035 PA-TagRFP-emerin, showing slow mobility oligomeric domains (blue, O) surrounded by areas  
1036 where emerin monomers diffuse faster (red, M). Scale: 500 nm. For (A, D): t-test, ns: non-  
1037 significant, \*\*:  $p < 0.01$ .  
1038

1039  
1040  
1041  
1042  
1043

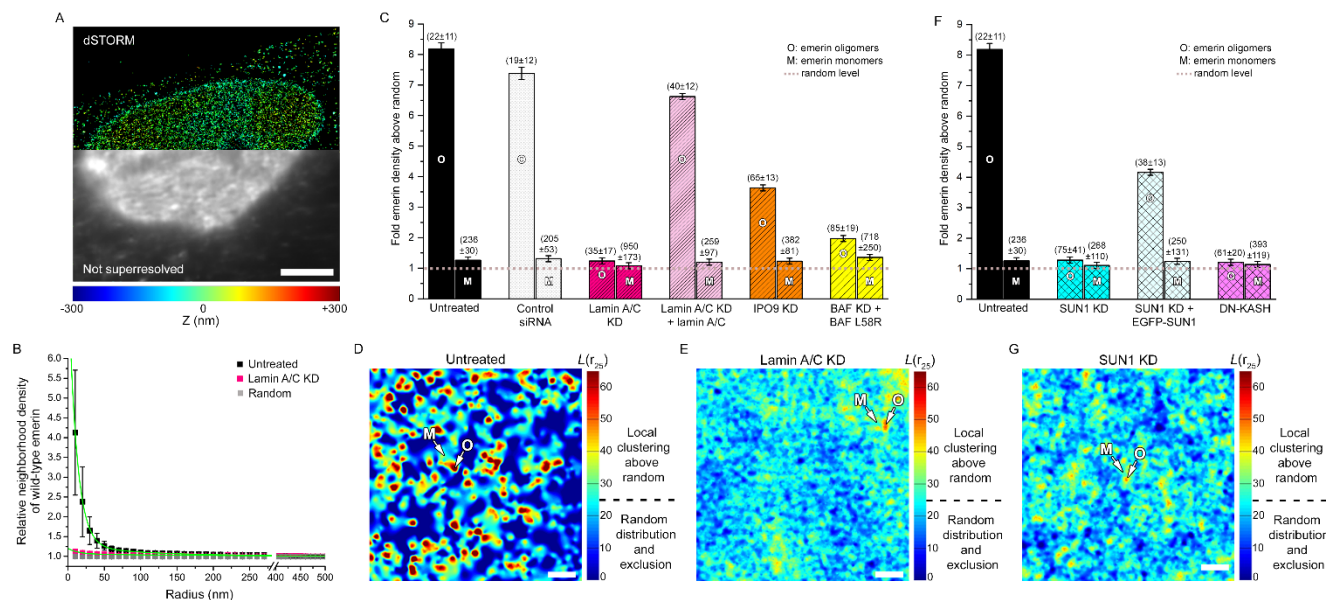

1044  
1045  
1046  
1047  
1048  
1049  
1050  
1051  
1052  
1053  
1054  
1055  
1056  
1057  
1058  
1059  
1060

**Fig. 3. Emerin forms oligomeric nanodomains stabilized by lamin A/C and SUN1 at the LINC complex.** (A) Super-resolved (top) and diffraction-limited imaging (bottom) of wild-type SNAP-emerin. Scale: 5  $\mu$ m. (B) Neighborhood densities ( $\pm$ s.d.) at various length scales for wild-type emerin before and after lamin A/C knockdown, compared to complete spatial randomness. Fit shown in green. (C) Molecular densities above random ( $\pm$ s.e.m.) of wild-type emerin oligomers (O) and monomers (M) in untreated cells, after control siRNA, lamin A/C knockdown, lamin A/C knockdown and exogenous expression of lamin A/C, IPO9 knockdown to deplete nuclear actin or replacement of endogenous BAF by BAF<sup>L58R</sup>. Values in parenthesis represent the size ( $\pm$ s.e.m.) of each domain in nanometers. (D) Local cluster map of wild-type emerin at the NE of an untreated HDF. (E) Local cluster map of wild-type emerin after lamin A/C knockdown. (F) Molecular densities above random ( $\pm$ s.e.m.) for wild-type emerin in untreated cells, after SUN1 knockdown, after SUN1 knockdown and exogenous expression of EGFP-SUN1 or after exogenous expression of mCherry-DN-KASH. (G) Local cluster map of wild-type emerin after SUN1 knockdown. For (D, E, G), M: monomer areas, O: oligomer nanodomains. Scales: 250 nm.

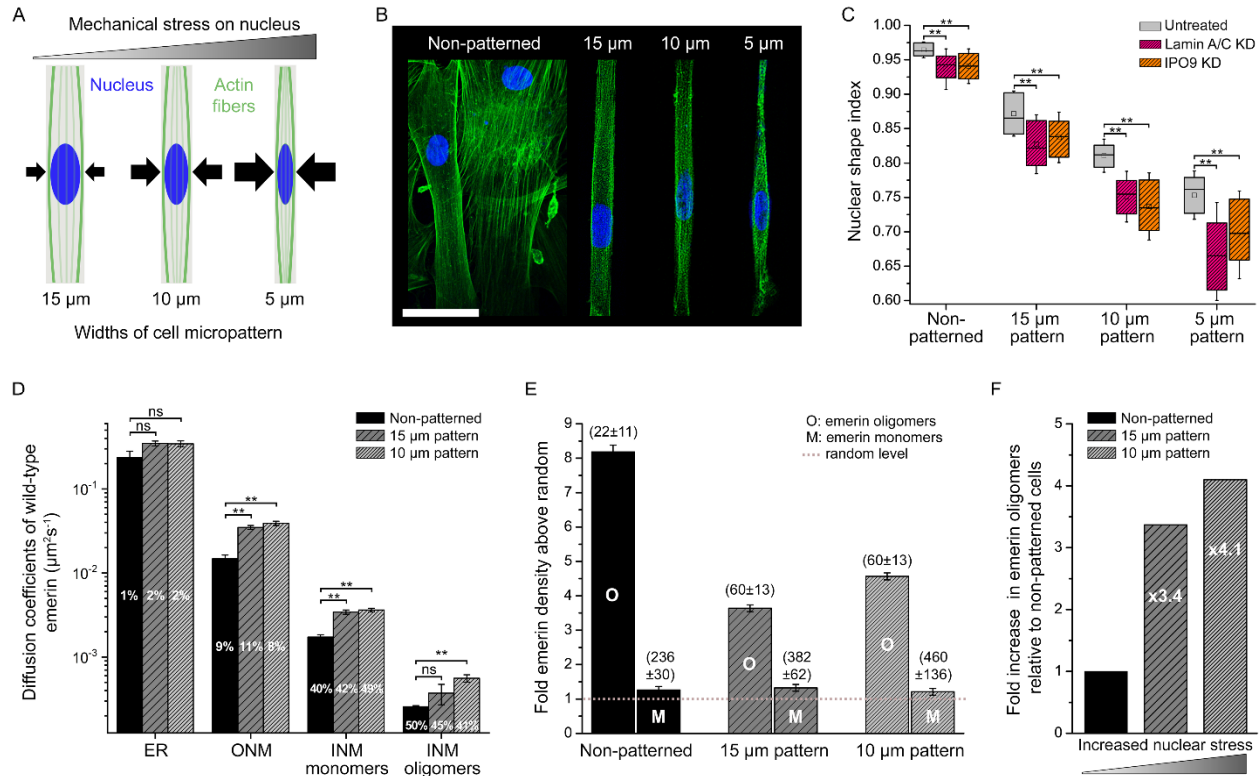

1061  
1062  
1063  
1064  
1065  
1066  
1067  
1068  
1069  
1070  
1071  
1072  
1073

**Fig. 4. Mechanical stress increases emerlin mobility and the formation of emerlin oligomers.** (A) Schematic of increasing nuclear mechanical stress by cell micropatterning. Arrows represent force. (B) Confocal imaging of actin (green) and the nucleus (blue) in micropatterned  $EMD^{+/y}$  HDF. Scale: 50  $\mu\text{m}$ . (C) Nuclear shape index as a function of micropattern width in  $EMD^{+/y}$  HDF depleted for lamin A/C or nuclear actin. Wilcoxon test, \*\*:  $p < 0.01$ . (D) Diffusion coefficients ( $\pm$ s.e.m.) and percentages of wild-type emerlin in non-patterned cells or after nuclear deformation on 15 and 10  $\mu\text{m}$  micropatterns. t-test, ns: non-significant, \*\*:  $p < 0.01$ . (E) Molecular densities above random ( $\pm$ s.e.m.) for wild-type emerlin oligomers (O) and monomers (M) in non-patterned  $EMD^{-/y}$  HDF and after nuclear deformation on 15 and 10  $\mu\text{m}$  micropatterns. Values in parenthesis represent the size ( $\pm$ s.e.m.) of each domain in nanometers. (F) Increase in emerlin oligomers as a function of nuclear stress.



1074  
1075

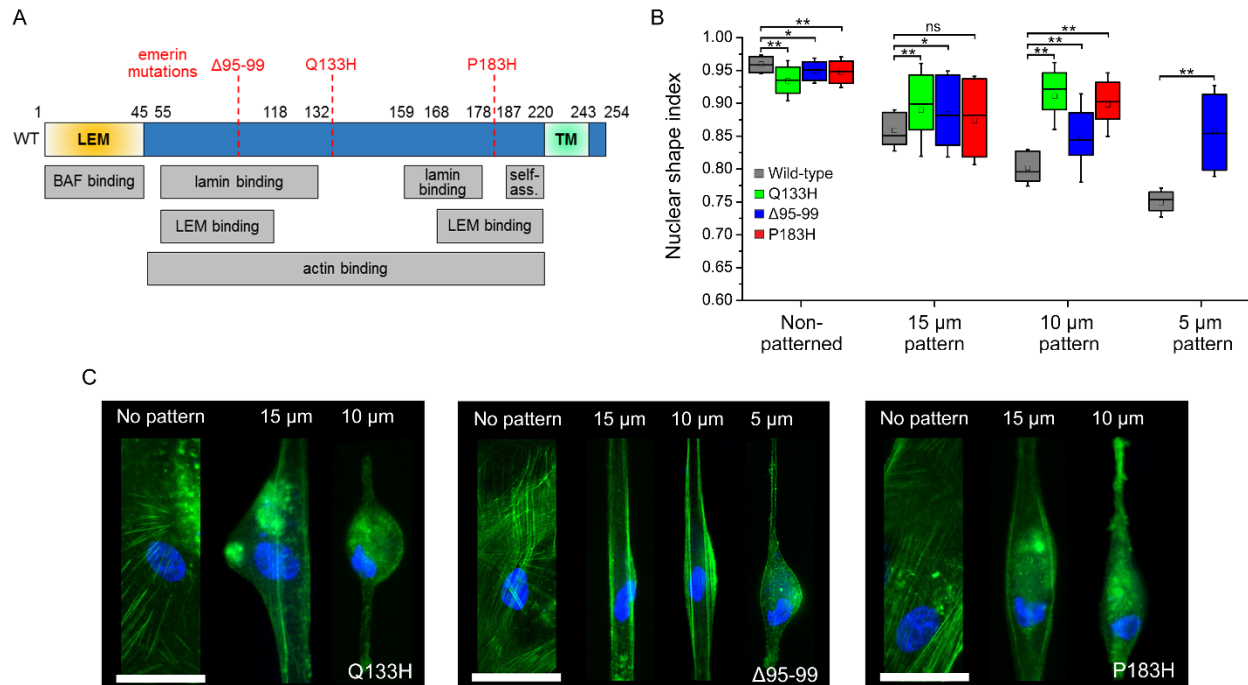

1076

1077 **Fig. 5. Emerin mutations induce defective nuclear shape adaptation against mechanical**  
 1078 **stress.** (A) Diagram of emerlin with binding and self-association domains (self-ass.) and position  
 1079 of  $\Delta 95-99$ , Q133H and P183H mutations. (B) Nuclear shape index as a function of micropattern  
 1080 width for  $EMD^{-/-}$  HDF expressing wild-type, Q133H,  $\Delta 95-99$  or P183H emerlin. Wilcoxon test,  
 1081 ns: non-significant, \*:  $p < 0.05$ , \*\*:  $p < 0.01$ . (C) Fluorescence imaging of actin (green) and the  
 1082 nucleus (blue) in micropatterned  $EMD^{-/-}$  HDF expressing Q133H,  $\Delta 95-99$  or P183H emerlin.  
 1083 Scales: 50  $\mu\text{m}$ .

1084



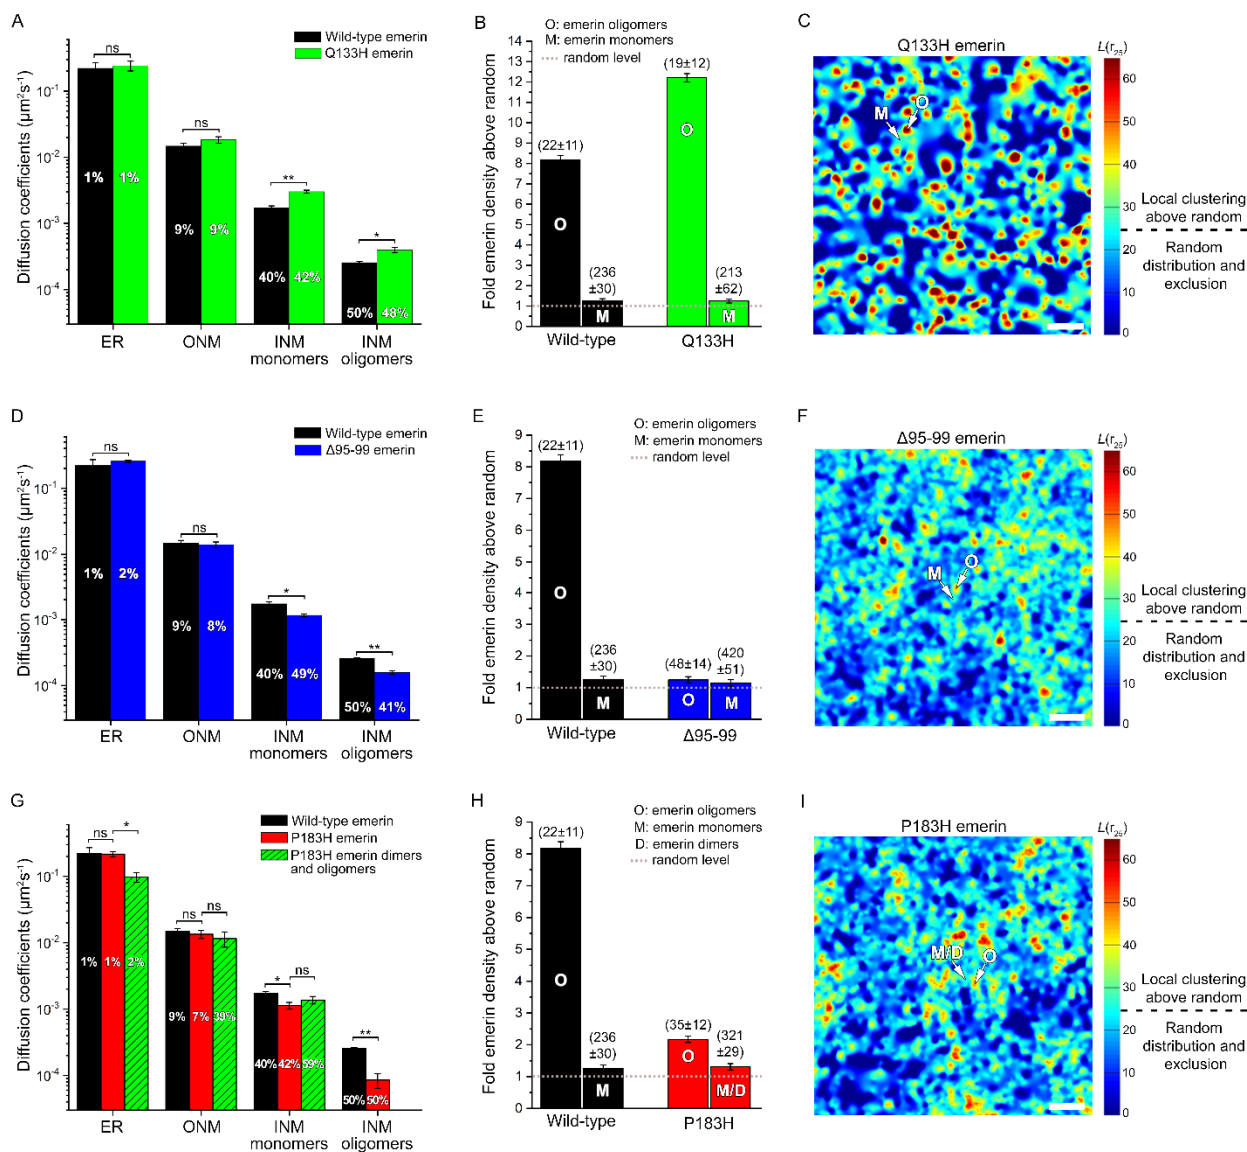

1085  
 1086 **Fig. 6. Emerin mutants exhibit modified lateral mobilities and defective oligomerization.**  
 1087 (A) Diffusion coefficients ( $\pm$ s.e.m.) and percentages of wild-type and Q133H emerin. (B)  
 1088 Molecular densities above random ( $\pm$ s.e.m.) for wild-type and Q133H emerin oligomers (O) and  
 1089 monomers (M). (C) Local cluster map of Q133H emerin. M: monomer areas, O: oligomer  
 1090 nanodomains. Scale: 250 nm. (D) Diffusion coefficients ( $\pm$ s.e.m.) and percentages of wild-type  
 1091 and  $\Delta 95-99$  emerin. (E) Molecular densities above random ( $\pm$ s.e.m.) for  $\Delta 95-99$  (208092  
 1092 localizations, 8 nuclei) and wild-type emerin oligomers (O) and monomers (M). (F) Local cluster  
 1093 map of  $\Delta 95-99$  emerin. Scale: 250 nm. (G) Diffusion coefficients ( $\pm$ s.e.m.) and percentages of  
 1094 wild-type and P183H emerin compared to complemented P183H emerin-GFP-emerin species.  
 1095 (H) Molecular densities above random ( $\pm$ s.e.m.) for P183H and wild-type emerin oligomers (O)  
 1096 and monomers/dimers (M/D). (I) Local cluster map of P183H emerin. M/D: monomer/dimer  
 1097 areas, O: oligomer nanodomains. Scale: 250 nm. For (A, D and G), t-test, ns: non-significant, \*:  
 1098  $p < 0.05$ , \*\*:  $p < 0.01$ . For (B, E and H), values in parenthesis represent the size ( $\pm$ s.e.m.) of each  
 1099 domain in nanometers.

1100  
1101

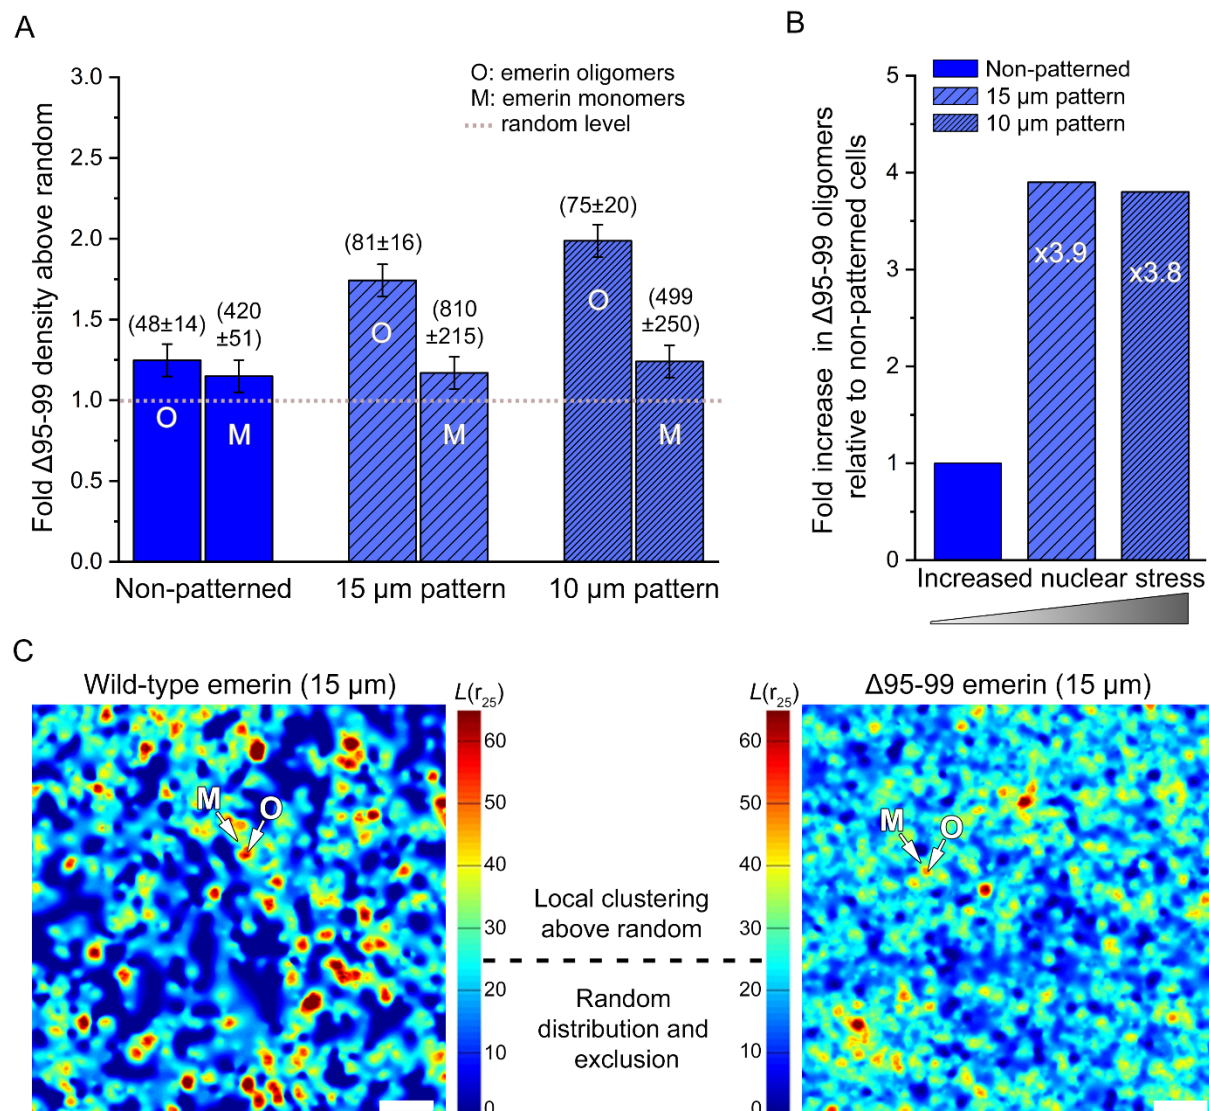

1102  
1103  
1104  
1105  
1106  
1107  
1108  
1109  
1110  
1111

**Fig. 7. Insufficient oligomerization of Δ95-99 emerlin mutant against mechanical stress.** (A) Molecular densities above random ( $\pm$ s.e.m.) for Δ95-99 emerlin oligomers (O) and monomers (M) in non-patterned cells or after nuclear deformation on 15 and 10 μm micropatterns. Values in parenthesis represent the size ( $\pm$ s.e.m.) of each domain in nanometers. (B) Changes in Δ95-99 emerlin oligomers as a function of nuclear stress on 15 and 10 μm micropatterns. (C) Local cluster maps of wild-type and Δ95-99 emerlin after nuclear deformation on 15 μm micropatterns. M: monomer areas, O: oligomer nanodomains. Scale: 250 nm.

1112

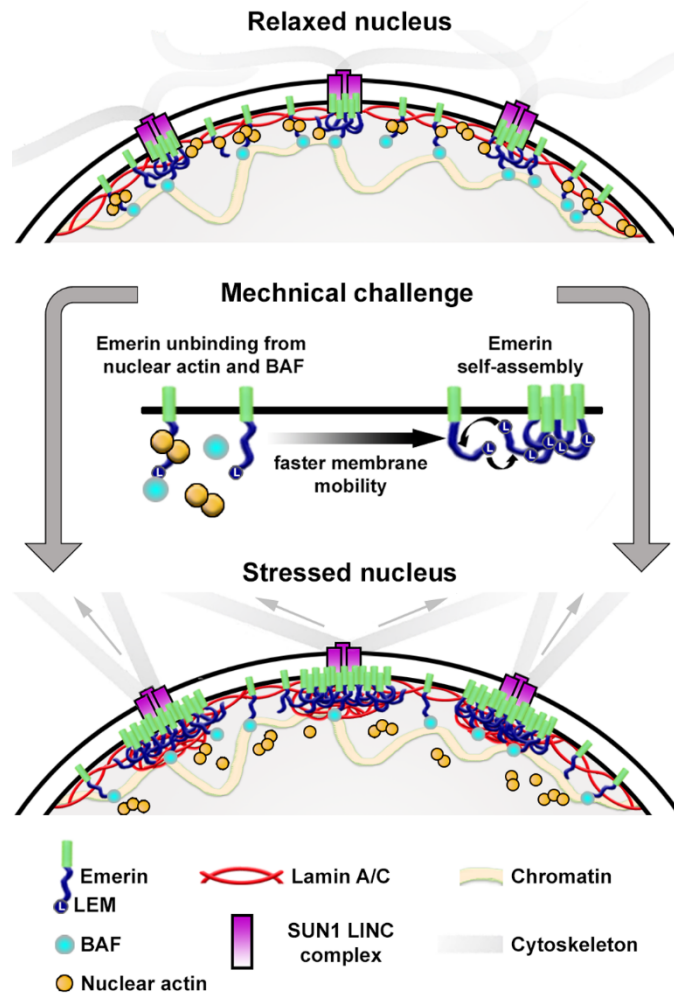

1113

1114

1115

1116

1117

1118

1119

**Fig. 8. Model of emerin re-organization at the nuclear envelope in response to mechanical challenges.** Emerin monomer unbinding from nuclear actin and BAF induces increased lateral mobility at the inner nuclear membrane and favors LEM domain interactions with binding sites along the intrinsically disordered region of other emerin, for the controlled formation of emerin oligomers at SUN1 LINC complexes and their stabilization by lamin A/C.

## 1120 References

- 1121 **Arsenovic, P. T., Ramachandran, I., Bathula, K., Zhu, R., Narang, J. D., Noll, N. A.,**  
1122 **Lemmon, C. A., Gundersen, G. G. and Conway, D. E.** (2016). Nesprin-2G, a Component of  
1123 the Nuclear LINC Complex, Is Subject to Myosin-Dependent Tension. *Biophys J* **110**, 34-43.
- 1124 **Baarlink, C., Plessner, M., Sherrard, A., Morita, K., Misu, S., Virant, D., Kleinschnitz, E.**  
1125 **M., Harniman, R., Alibhai, D., Baumeister, S. et al.** (2017). A transient pool of nuclear F-  
1126 actin at mitotic exit controls chromatin organization. *Nature Cell Biology* **19**, 1389-1399.
- 1127 **Bautista, M., Fernandez, A. and Pinaud, F.** (2019). A Micropatterning Strategy to Study  
1128 Nuclear Mechanotransduction in Cells. *Micromachines (Basel)* **10**.
- 1129 **Belin, B. J., Cimini, B. A., Blackburn, E. H. and Mullins, R. D.** (2013). Visualization of  
1130 actin filaments and monomers in somatic cell nuclei. *Molecular Biology of the Cell* **24**, 982-94.
- 1131 **Bengtsson, L. and Wilson, K. L.** (2004). Multiple and surprising new functions for emerin, a  
1132 nuclear membrane protein. *Current Opinion in Cell Biology* **16**, 73-9.
- 1133 **Berk, J. M., Maitra, S., Dawdy, A. W., Shabanowitz, J., Hunt, D. F. and Wilson, K. L.**  
1134 (2013a). O-Linked beta-N-acetylglucosamine (O-GlcNAc) regulates emerin binding to barrier  
1135 to autointegration factor (BAF) in a chromatin- and lamin B-enriched "niche". *Journal of*  
1136 *Biological Chemistry* **288**, 30192-209.
- 1137 **Berk, J. M., Simon, D. N., Jenkins-Houk, C. R., Westerbeck, J. W., Gronning-Wang, L.**  
1138 **M., Carlson, C. R. and Wilson, K. L.** (2014). The molecular basis of emerin-emerin and  
1139 emerin-BAF interactions. *Journal of Cell Science* **127**, 3956-69.
- 1140 **Berk, J. M., Tiffit, K. E. and Wilson, K. L.** (2013b). The nuclear envelope LEM-domain  
1141 protein emerin. *Nucleus* **4**, 298-314.
- 1142 **Burger, M., Schmitt-Koopmann, C. and Leroux, J.-C.** (2020). DNA unchained: two assays  
1143 to discover and study inhibitors of the DNA clustering function of barrier-to-autointegration  
1144 factor. *Scientific Reports* **10**, 12301.
- 1145 **Clements, L., Manilal, S., Love, D. R. and Morris, G. E.** (2000). Direct interaction between  
1146 emerin and lamin A. *Biochemical and Biophysical Research Communications* **267**, 709-14.
- 1147 **Crisp, M., Liu, Q., Roux, K., Rattner, J. B., Shanahan, C., Burke, B., Stahl, P. D. and**  
1148 **Hodzic, D.** (2006). Coupling of the nucleus and cytoplasm: role of the LINC complex. *Journal*  
1149 *of Cell Biology* **172**, 41-53.
- 1150 **Cui, Y., Hameed, F. M., Yang, B., Lee, K., Pan, C. Q., Park, S. and Sheetz, M.** (2015).  
1151 Cyclic stretching of soft substrates induces spreading and growth. *Nature Communications* **6**,  
1152 6333.
- 1153 **Demmerle, J., Koch, A. J. and Holaska, J. M.** (2012). The nuclear envelope protein emerin  
1154 binds directly to histone deacetylase 3 (HDAC3) and activates HDAC3 activity. *The Journal of*  
1155 *Biological Chemistry* **287**, 22080-8.
- 1156 **Dopie, J., Skarp, K. P., Rajakyla, E. K., Tanhuanpaa, K. and Vartiainen, M. K.** (2012).  
1157 Active maintenance of nuclear actin by importin 9 supports transcription. *Proceedings of the*  
1158 *National Academy of Sciences of the United States of America* **109**, E544-52.
- 1159 **Emery, A. E. and Drefuss, F. E.** (1966). Unusual type of benign x-linked muscular  
1160 dystrophy. *J Neurol Neurosurg Psychiatry* **29**, 338-42.



- 1161 **Fairley, E. A., Kendrick-Jones, J. and Ellis, J. A.** (1999). The Emery-Dreifuss muscular  
1162 dystrophy phenotype arises from aberrant targeting and binding of emerin at the inner nuclear  
1163 membrane. *Journal of Cell Science* **112** ( Pt 15), 2571-82.
- 1164 **Fernandez, A., Bautista, M., Stanciauskas, R., Chung, T. and Pinaud, F.** (2017). Cell-  
1165 Shaping Micropatterns for Quantitative Super-Resolution Microscopy Imaging of Membrane  
1166 Mechanosensing Proteins. *ACS Applied Materials & Interfaces* **9**, 27575-27586.
- 1167 **Fidzianska, A. and Hausmanowa-Petrusewicz, I.** (2003). Architectural abnormalities in  
1168 muscle nuclei. Ultrastructural differences between X-linked and autosomal dominant forms of  
1169 EDMD. *Journal of the Neurological Sciences* **210**, 47-51.
- 1170 **Frock, R. L., Kudlow, B. A., Evans, A. M., Jameson, S. A., Hauschka, S. D. and Kennedy,  
1171 B. K.** (2006). Lamin A/C and emerin are critical for skeletal muscle satellite cell  
1172 differentiation. *Genes Dev* **20**, 486-500.
- 1173 **Getis, A. and Franklin, J.** (1987). Second-Order Neighborhood Analysis of Mapped Point  
1174 Patterns. *Ecology* **68**, 473-477.
- 1175 **Guilluy, C., Osborne, L. D., Van Landeghem, L., Sharek, L., Superfine, R., Garcia-Mata,  
1176 R. and Burrige, K.** (2014). Isolated nuclei adapt to force and reveal a mechanotransduction  
1177 pathway in the nucleus. *Nature Cell Biology* **16**, 376-81.
- 1178 **Haque, F., Lloyd, D. J., Smallwood, D. T., Dent, C. L., Shanahan, C. M., Fry, A. M.,  
1179 Trembath, R. C. and Shackleton, S.** (2006). SUN1 interacts with nuclear lamin A and  
1180 cytoplasmic nesprins to provide a physical connection between the nuclear lamina and the  
1181 cytoskeleton. *Mol Cell Biol* **26**, 3738-51.
- 1182 **Haque, F., Mazzeo, D., Patel, J. T., Smallwood, D. T., Ellis, J. A., Shanahan, C. M. and  
1183 Shackleton, S.** (2010). Mammalian SUN protein interaction networks at the inner nuclear  
1184 membrane and their role in laminopathy disease processes. *Journal of Biological Chemistry*  
1185 **285**, 3487-98.
- 1186 **Haraguchi, T., Kojidani, T., Koujin, T., Shimi, T., Osakada, H., Mori, C., Yamamoto, A.  
1187 and Hiraoka, Y.** (2008). Live cell imaging and electron microscopy reveal dynamic processes  
1188 of BAF-directed nuclear envelope assembly. *Journal of Cell Science* **121**, 2540-54.
- 1189 **Hennen, J., Saunders, C. A., Mueller, J. D. and Luxton, G. W. G.** (2018). Fluorescence  
1190 fluctuation spectroscopy reveals differential SUN protein oligomerization in living cells.  
1191 *Molecular Biology of the Cell* **29**, 1003-1011.
- 1192 **Herrada, I., Samson, C., Velours, C., Renault, L., Ostlund, C., Chervy, P., Puchkov, D.,  
1193 Worman, H. J., Buendia, B. and Zinn-Justin, S.** (2015). Muscular Dystrophy Mutations  
1194 Impair the Nuclear Envelope Emerin Self-assembly Properties. *ACS Chemical Biology* **10**,  
1195 2733-42.
- 1196 **Hirano, Y., Segawa, M., Ouchi, F. S., Yamakawa, Y., Furukawa, K., Takeyasu, K. and  
1197 Horigome, T.** (2005). Dissociation of Emerin from Barrier-to-autointegration Factor Is  
1198 Regulated through Mitotic Phosphorylation of Emerin in a Xenopus Egg Cell-free System\*.  
1199 *Journal of Biological Chemistry* **280**, 39925-39933.
- 1200 **Ho, C. Y., Jaalouk, D. E., Vartiainen, M. K. and Lammerding, J.** (2013). Lamin A/C and  
1201 emerin regulate MKL1-SRF activity by modulating actin dynamics. *Nature* **497**, 507-511.
- 1202 **Holaska, J. M., Kowalski, A. K. and Wilson, K. L.** (2004). Emerin caps the pointed end of  
1203 actin filaments: evidence for an actin cortical network at the nuclear inner membrane. *PLoS*  
1204 *Biology* **2**, E231.

- 1205 **Holt, I., Clements, L., Manilal, S. and Morris, G. E.** (2001). How does a g993t mutation in  
1206 the emerin gene cause Emery-Dreifuss muscular dystrophy? *Biochemical and Biophysical*  
1207 *Research Communications* **287**, 1129-33.
- 1208 **Jahed, Z., Fadavi, D., Vu, U. T., Asgari, E., Luxton, G. W. G. and Mofrad, M. R. K.**  
1209 (2018). Molecular Insights into the Mechanisms of SUN1 Oligomerization in the Nuclear  
1210 Envelope. *Biophysical Journal* **114**, 1190-1203.
- 1211 **Kirby, T. J. and Lammerding, J.** (2018). Emerging views of the nucleus as a cellular  
1212 mechanosensor. *Nature Cell Biology* **20**, 373-381.
- 1213 **Lagardère, M., Chamma, I., Bouilhol, E., Nikolski, M. and Thoumine, O.** (2020). FluoSim:  
1214 simulator of single molecule dynamics for fluorescence live-cell and super-resolution imaging  
1215 of membrane proteins. *Scientific Reports* **10**, 19954.
- 1216 **Lammerding, J., Hsiao, J., Schulze, P. C., Kozlov, S., Stewart, C. L. and Lee, R. T.** (2005).  
1217 Abnormal nuclear shape and impaired mechanotransduction in emerin-deficient cells. *Journal*  
1218 *of Cell Biology* **170**, 781-91.
- 1219 **Lee, K. K., Haraguchi, T., Lee, R. S., Koujin, T., Hiraoka, Y. and Wilson, K. L.** (2001).  
1220 Distinct functional domains in emerin bind lamin A and DNA-bridging protein BAF. *Journal*  
1221 *of Cell Science* **114**, 4567-73.
- 1222 **Loi, M., Cenni, V., Duchi, S., Squarzoni, S., Lopez-Otin, C., Foisner, R., Lattanzi, G. and**  
1223 **Capanni, C.** (2016). Barrier-to-autointegration factor (BAF) involvement in prelamin A-  
1224 related chromatin organization changes. *Oncotarget* **7**, 15662-77.
- 1225 **Lombardi, M. L., Jaalouk, D. E., Shanahan, C. M., Burke, B., Roux, K. J. and**  
1226 **Lammerding, J.** (2011). The interaction between nesprins and sun proteins at the nuclear  
1227 envelope is critical for force transmission between the nucleus and cytoskeleton. *Journal of*  
1228 *Biological Chemistry* **286**, 26743-53.
- 1229 **Lu, W., Gotzmann, J., Sironi, L., Jaeger, V. M., Schneider, M., Lüke, Y., Uhlén, M.,**  
1230 **Szigyarto, C. A., Brachner, A., Ellenberg, J. et al.** (2008). Sun1 forms immobile  
1231 macromolecular assemblies at the nuclear envelope. *Biochim Biophys Acta* **1783**, 2415-26.
- 1232 **Maurer, M. and Lammerding, J.** (2019). The Driving Force: Nuclear Mechanotransduction  
1233 in Cellular Function, Fate, and Disease. *Annual Review of Biomedical Engineering* **21**, 443-  
1234 468.
- 1235 **Mislow, J. M. K., Holaska, J. M., Kim, M. S., Lee, K. K., Segura-Totten, M., Wilson, K.**  
1236 **L. and McNally, E. M.** (2002). Nesprin-1 $\alpha$  self-associates and binds directly to emerin and  
1237 lamin A in vitro. *FEBS Letters* **525**, 135-140.
- 1238 **Mortensen, K. I., Churchman, L. S., Spudich, J. A. and Flyvbjerg, H.** (2010). Optimized  
1239 localization analysis for single-molecule tracking and super-resolution microscopy. *Nature*  
1240 *Methods* **7**, 377-81.
- 1241 **Ostlund, C., Ellenberg, J., Hallberg, E., Lippincott-Schwartz, J. and Worman, H. J.**  
1242 (1999). Intracellular trafficking of emerin, the Emery-Dreifuss muscular dystrophy protein.  
1243 *Journal of Cell Science* **112 ( Pt 11)**, 1709-19.
- 1244 **Ostlund, C., Sullivan, T., Stewart, C. L. and Worman, H. J.** (2006). Dependence of  
1245 diffusional mobility of integral inner nuclear membrane proteins on A-type lamins.  
1246 *Biochemistry* **45**, 1374-82.



- 1247 **Pengo, T., Holden, S. J. and Manley, S.** (2015). PALMsiever: a tool to turn raw data into  
1248 results for single-molecule localization microscopy. *Bioinformatics* **31**, 797-8.
- 1249 **Perry, G. L. W.** (2004). SpPack: spatial point pattern analysis in Excel using Visual Basic for  
1250 Applications (VBA). *Environmental Modelling & Software* **19**, 559-569.
- 1251 **Phair, R. D., Gorski, S. A. and Misteli, T.** (2004). Measurement of dynamic protein binding  
1252 to chromatin in vivo, using photobleaching microscopy. *Methods in Enzymology* **375**, 393-414.
- 1253 **Pinaud, F. and Dahan, M.** (2011). Targeting and imaging single biomolecules in living cells  
1254 by complementation-activated light microscopy with split-fluorescent proteins. *Proceedings of*  
1255 *the National Academy of Sciences* **108**, E201-E210.
- 1256 **Roberts, R. C., Sutherland-Smith, A. J., Wheeler, M. A., Jensen, O. N., Emerson, L. J.,**  
1257 **Spiliotis, II, Tate, C. G., Kendrick-Jones, J. and Ellis, J. A.** (2006). The Emery-Dreifuss  
1258 muscular dystrophy associated-protein emerin is phosphorylated on serine 49 by protein kinase  
1259 A. *FEBS Journal* **273**, 4562-75.
- 1260 **Rowat, A. C., Lammerding, J. and Ipsen, J. H.** (2006). Mechanical properties of the cell  
1261 nucleus and the effect of emerin deficiency. *Biophysical Journal* **91**, 4649-64.
- 1262 **Sakaki, M., Koike, H., Takahashi, N., Sasagawa, N., Tomioka, S., Arahata, K. and**  
1263 **Ishiura, S.** (2001). Interaction between emerin and nuclear lamins. *Journal of Biochemistry*  
1264 **129**, 321-7.
- 1265 **Salpingidou, G., Smertenko, A., Hausmanowa-Petrucewicz, I., Hussey, P. J. and**  
1266 **Hutchison, C. J.** (2007). A novel role for the nuclear membrane protein emerin in association  
1267 of the centrosome to the outer nuclear membrane. *Journal of Cell Biology* **178**, 897-904.
- 1268 **Samson, C., Celli, F., Hendriks, K., Zinke, M., Essawy, N., Herrada, I., Arteni, A. A.,**  
1269 **Theillet, F. X., Alpha-Bazin, B., Armengaud, J. et al.** (2017). Emerin self-assembly  
1270 mechanism: role of the LEM domain. *FEBS Journal* **284**, 338-352.
- 1271 **Samson, C., Petitalot, A., Celli, F., Herrada, I., Ropars, V., Le Du, M. H., Nhiri, N.,**  
1272 **Jacquet, E., Arteni, A. A., Buendia, B. et al.** (2018). Structural analysis of the ternary  
1273 complex between lamin A/C, BAF and emerin identifies an interface disrupted in autosomal  
1274 recessive progeroid diseases. *Nucleic Acids Research* **46**, 10460-10473.
- 1275 **Samwer, M., Schneider, M. W. G., Hoefler, R., Schmalhorst, P. S., Jude, J. G., Zuber, J.**  
1276 **and Gerlich, D. W.** (2017). DNA Cross-Bridging Shapes a Single Nucleus from a Set of  
1277 Mitotic Chromosomes. *Cell* **170**, 956-972 e23.
- 1278 **Schneider, C. A., Rasband, W. S. and Eliceiri, K. W.** (2012). NIH Image to ImageJ: 25  
1279 years of image analysis. *Nature Methods* **9**, 671-5.
- 1280 **Schutz, G. J., Schindler, H. and Schmidt, T.** (1997). Single-molecule microscopy on model  
1281 membranes reveals anomalous diffusion. *Biophysical Journal* **73**, 1073-80.
- 1282 **Sengupta, P., Jovanovic-Taliman, T., Skoko, D., Renz, M., Veatch, S. L. and Lippincott-**  
1283 **Schwartz, J.** (2011). Probing protein heterogeneity in the plasma membrane using PALM and  
1284 pair correlation analysis. *Nature Methods* **8**, 969-75.
- 1285 **Serge, A., Bertaux, N., Rigneault, H. and Marguet, D.** (2008). Dynamic multiple-target  
1286 tracing to probe spatiotemporal cartography of cell membranes. *Nature Methods* **5**, 687-94.
- 1287 **Shimi, T., Koujin, T., Segura-Totten, M., Wilson, K. L., Haraguchi, T. and Hiraoka, Y.**  
1288 (2004). Dynamic interaction between BAF and emerin revealed by FRAP, FLIP, and FRET  
1289 analyses in living HeLa cells. *Journal of Structural Biology* **147**, 31-41.

1290 **Soumpasis, D. M.** (1983). Theoretical analysis of fluorescence photobleaching recovery  
1291 experiments. *Biophysical Journal* **41**, 95-7.

1292 **Stephens, A. D., Banigan, E. J., Adam, S. A., Goldman, R. D. and Marko, J. F.** (2017).  
1293 Chromatin and lamin A determine two different mechanical response regimes of the cell  
1294 nucleus. *Molecular Biology of the Cell* **28**, 1984-1996.

1295 **Stoynova, L., Solórzano, R. and Collins, E. D.** (2004). Generation of large deletion mutants  
1296 from plasmid DNA. *BioTechniques* **36**, 402-4, 406.

1297 **Subach, F. V., Patterson, G. H., Renz, M., Lippincott-Schwartz, J. and Verkhusha, V. V.**  
1298 (2010). Bright monomeric photoactivatable red fluorescent protein for two-color super-  
1299 resolution sptPALM of live cells. *Journal of the American Chemical Society* **132**, 6481-91.

1300 **Talamas, J. A. and Hetzer, M. W.** (2011). POM121 and Sun1 play a role in early steps of  
1301 interphase NPC assembly. *Journal of Cell Biology* **194**, 27-37.

1302 **Talkop, U. A., Talvik, I., Sõnajalg, M., Sibul, H., Kolk, A., Piirsoo, A., Warzok, R., Wulff,**  
1303 **K., Wehnert, M. S. and Talvik, T.** (2002). Early onset of cardiomyopathy in two brothers  
1304 with X-linked Emery-Dreifuss muscular dystrophy. *Neuromuscular Disorders* **12**, 878-81.

1305 **Thompson, R. E., Larson, D. R. and Webb, W. W.** (2002). Precise nanometer localization  
1306 analysis for individual fluorescent probes. *Biophysical Journal* **82**, 2775-83.

1307 **Tifft, K. E., Bradbury, K. A. and Wilson, K. L.** (2009). Tyrosine phosphorylation of nuclear-  
1308 membrane protein emerin by Src, Abl and other kinases. *Journal of Cell Science* **122**, 3780-90.

1309 **Tokunaga, M., Imamoto, N. and Sakata-Sogawa, K.** (2008). Highly inclined thin  
1310 illumination enables clear single-molecule imaging in cells. *Nature Methods* **5**, 159-61.

1311 **van de Linde, S., Löschberger, A., Klein, T., Heidbreder, M., Wolter, S., Heilemann, M.**  
1312 **and Sauer, M.** (2011). Direct stochastic optical reconstruction microscopy with standard  
1313 fluorescent probes. *Nature Protocols* **6**, 991-1009.

1314 **Wolter, S., Loschberger, A., Holm, T., Aufmkolk, S., Dabauvalle, M. C., van de Linde, S.**  
1315 **and Sauer, M.** (2012). rapidSTORM: accurate, fast open-source software for localization  
1316 microscopy. *Nature Methods* **9**, 1040-1.

1317

1318

1319

1320

1321

1322

1323
